1 **Premeiotic and meiotic failures associate with hybrid male sterility in the**  
2 ***Anopheles gambiae* complex**

3 Short title: The cellular basis of hybrid male sterility in malaria mosquitoes

4

5 **Jiangtao Liang<sup>1</sup>, Igor V. Sharakhov<sup>1,2,\*</sup>**

6

7 <sup>1</sup>Department of Entomology, Virginia Polytechnic Institute and State University, Blacksburg,  
8 Virginia, United States of America

9 <sup>2</sup>Department of Cytology and Genetics, Tomsk State University, Tomsk, Russian Federation

10 **\*Corresponding author**

11 E-mail: [igor@vt.edu](mailto:igor@vt.edu)

12 **Abstract**

13 Hybrid male sterility contributes to speciation by restricting gene flow between related taxa at the  
14 beginning stages of postzygotic isolation. However, we have limited knowledge about cellular  
15 processes and molecular mechanisms that come into play when fertility is first affected. Hybrids  
16 between closely related species of the *Anopheles gambiae* complex offer opportunities to identify  
17 spermatogenic errors that arise early during speciation. To investigate possible cellular causes of  
18 hybrid male sterility, we performed crosses between sibling species of the *An. gambiae* complex.  
19 Our results demonstrate that testes are severely underdeveloped in hybrids between male *An.*  
20 *merus* and female *An. gambiae* or *An. coluzzii*. No meiotic chromosomes are identified in these  
21 hybrid males. However, testes have nearly normal morphologies and sizes but produce mostly

22 nonmotile spermatozoa in hybrids from the reciprocal crosses. Using chromosome X- and Y-  
23 specific fluorescent probes, we followed the process of meiosis in each species and their F1  
24 hybrids between female *An. merus* and male *An. gambiae* or *An. coluzzii*. Unlike for pure  
25 species, sex chromosomes in meiotic prophase I of F1 hybrids are largely unpaired and all  
26 chromosomes show various degrees of insufficient condensation. Instead of entering the  
27 reductional division in meiosis I, primary spermatocytes undergo an equational mitotic division  
28 producing abnormal diploid sperm. Meiotic chromosomes of some F1 hybrid individuals are  
29 involved in *de novo* genome rearrangements. Yet, the germline-specific genes *β2-tubulin*, *Ams*,  
30 *mts*, and *Dzip11* express normally in these hybrid males. Thus, our study identified cytogenetic  
31 errors in hybrids that arise during the early stages of postzygotic isolation. This knowledge will  
32 inform the development of innovative mosquito control strategies based on population  
33 suppression by manipulating reproduction via genetic technologies.

34

## 35 **Author Summary**

36 The genetic basis and molecular mechanisms of hybrid male sterility are of considerable  
37 interest as they inform our understanding of both speciation and normal fertility function. Studies  
38 of sterility in male hybrids between recently evolved species offer opportunities to identify  
39 developmental errors that arise early in speciation. We performed crosses between sibling  
40 species of the *Anopheles gambiae* complex to gain insights into a cellular basis of postzygotic  
41 isolation. We demonstrate that hybrid male sterility in the malaria mosquitoes is caused by two  
42 processes in reciprocal crosses: premeiotic arrest in germline stem cells and the failure of the  
43 reductional meiotic division in primary spermatocytes. The meiotic abnormalities also include  
44 unpairing of sex chromosomes, chromatin decompaction, and, in some cases, *de novo* genome

45 rearrangements. The failure of the reductional division in meiosis I results in the production of  
46 diploid nonmotile sperm. Despite these meiotic errors, tested germline-specific genes express  
47 normally in these hybrid males. Thus, our study identified cellular errors in hybrids that arise  
48 during the early stages of postzygotic isolation. Studying molecular mechanisms of the  
49 developmental abnormalities in testes of hybrids between closely related species of mosquitoes  
50 will improve our knowledge of speciation and empower the sterile insect technique.

51

## 52 **Introduction**

53 Hybrid male fertility is among the first phenotypes affected as the postzygotic isolation between  
54 species is being established [1]. Therefore, genetic factors, cellular basis, and molecular  
55 mechanisms of hybrid male sterility are of considerable interest, as they inform our  
56 understanding of both speciation and normal fertility function. Genetic loci responsible for  
57 hybrid male sterility in plants and animals are often being identified using quantitative trait loci  
58 (QTL) mapping [1-8]. In a variety of organisms, hybrid sterility can be caused by the genetic  
59 factors on the X chromosome or by epistasis between X-linked and autosomal alleles [4, 8-15].  
60 Studies in animals commonly assess testis shape, size or weight, as well as sperm morphology,  
61 density or motility to define male sterility phenotypes. However, a cellular basis of hybrid male  
62 sterility is rarely investigated. Cytological studies of spermatogenesis in sterile hybrids indicate  
63 that multiple mechanisms of functional sterility are possible. Sterile hybrids between *Mus*  
64 *musculus domesticus* and *M. m. musculus* have spermatogenic arrest in early meiosis I with  
65 disrupted both homoeologous chromosome pairing and meiotic sex chromosome inactivation  
66 [16, 17], as well as reductions in spermatocyte and spermatid number, increased apoptosis of  
67 primary spermatocytes, and more multinucleated syncytia [18]. Studies of failed spermatogenesis

68 in different *Drosophila* hybrids observed arrests at the premeiotic stage [19], reduced  
69 chromosome pairing and unequal chromosome segregation in meiosis [20, 21], characteristic  
70 spermiogenic arrests [19], spermatid abnormalities [22], and problems in sperm bundling and  
71 motility [23, 24]. Detailed analyses of cellular and developmental abnormalities in testes of  
72 various hybrid organisms could help better define the causes of infertility. Cytological studies of  
73 spermatogenesis in hybrids may link different sterility phenotypes to the early or advance stages  
74 of postzygotic isolation. Moreover, identification of first-evolved cytogenetic errors in hybrids  
75 between closely related species could improve our understanding of speciation.

76

77 The *Anopheles gambiae* complex consists of at least eight morphologically nearly  
78 indistinguishable sibling species of African malaria mosquitoes [25, 26]. Genome-based  
79 estimations of the age of the *An. gambiae* complex vary from 1.85 [27] to as young as 0.526  
80 million years [28]. Genomic introgression has been found prevalent in autosomal regions of  
81 several species indicating naturally occurring interspecies hybridization [27, 28]. Experimental  
82 crosses of species from the *An. gambiae* complex often produce sterile F1 hybrid males  
83 confirming Haldane's rule of sterility or inviability of the heterogametic sex [13, 29-31]. Early  
84 crossing experiments between members of the complex have found that hybrid male sterility is  
85 associated with various degrees of atrophies of testes and underdevelopment of sperms [30].  
86 Examination of hybrid sterility in backcrosses of *An. gambiae* and *An. arabiensis* using an X-  
87 linked white-eye marker demonstrated a large effect of the X chromosome on male hybrid  
88 sterility [32]. The large X effect on hybrid sterility has been supported with a QTL mapping  
89 approach [13]. However, an introgression of the Y chromosome from *An. gambiae* into a  
90 background of *An. arabiensis* has shown no apparent influence on male fertility, fitness, or gene

91 expression [29]. A recent study of hybridization in nature has shown that postmating isolation is  
92 positively associated with ecological divergence of *An. coluzzii*, *An. gambiae*, and *An. arabiensis*  
93 [33]. However, the cellular basis and molecular mechanisms of hybrid male sterility in  
94 mosquitoes are unknown. Because of the recent evolution and ease of hybridization, sibling  
95 species of the *An. gambiae* complex offer great opportunities to provide insights into  
96 mechanisms of speciation.

97

98 A recent World Health Organization report has shown that after a successful period of global  
99 malaria control, progress has stalled since 2015. There are still 219 million cases and 435,000  
100 related deaths from malaria without a tendency to decrease [34]. In the 60s-70s, the sterile insect  
101 technique (SIT) was one of the first methods used to control the malaria-transmitting *Anopheles*  
102 mosquitoes as it aimed to interfere with their reproduction by introducing sterile males into  
103 natural populations. However, because of the low competitiveness of X-ray-irradiated males and  
104 the lack of institutional commitments, the traditional SIT largely failed in controlling malaria  
105 mosquitoes [35]. Novel genetic approaches based on CRISPR-Cas9 gene drives [36-40] show  
106 potential toward the generation of self-sustainable and species-specific mosquito control  
107 strategies. A better understanding of the normal male fertility function and mechanisms of  
108 naturally occurring hybrid male sterility will inform the development of novel SIT tools and  
109 implementation of pre-existing technologies for the control of malaria-transmitting mosquitoes.

110

111 Here, we investigate possible cellular causes of male sterility in hybrids between sibling species  
112 of the *An. gambiae* complex. We asked three specific questions: (i) Which cellular processes are  
113 involved in causing infertility in hybrid mosquito males? (ii) Are the defects leading to hybrid

114 male sterility premeiotic, meiotic, or postmeiotic? and (iii) What cytogenetic errors trigger the  
115 spermatogenic breakdown? We demonstrate that hybrid male sterility in malaria mosquitoes is  
116 caused by two cellular processes in reciprocal crosses: premeiotic arrest in germline stem cells  
117 and the failure of the reductional meiotic division in primary spermatocytes. Our data suggest  
118 that the meiotic abnormalities in hybrid males stem from the unpairing of the sex chromosomes  
119 and chromatin decondensation. Thus, our study identified first cytogenetic errors in hybrids that  
120 arise during the early stages of postzygotic isolation.

121

## 122 **Results**

123

### 124 **Hybrid male sterility phenotypes at the cellular level**

125 To obtain sterile males, we performed reciprocal crosses between *An. merus* MAF and *An.*  
126 *gambiae* ZANU or *An. coluzzii* MOPTI and MALI. Backcrossing of F1 males to parental  
127 females resulted in no progeny demonstrating sterility of F1 hybrid males. This result confirms  
128 Haldane's rule for the majority of interspecies crosses in the *An. gambiae* complex, except for  
129 crosses between *An. gambiae* and *An. coluzzii*: F1 females are fertile while F1 males are sterile  
130 [13, 29-31, 41, 42]. To investigate the developmental phenotypes associated with hybrid sterility,  
131 we dissected testes from adult males obtained from interspecies crosses and from pure species.  
132 Normal testes of pure species have a spindle-like shape (Fig 1A). We found obvious asymmetry  
133 in morphology and sizes of testes when reciprocal crosses were compared. Hybrid males from  
134 crosses between female *An. merus* and male *An. gambiae* or *An. coluzzii* display normal-like  
135 reproductive organs (Fig 1B). In contrast, F1 males from crosses between female *An. gambiae* or  
136 *An. coluzzii* and male *An. merus* show severely underdeveloped testes (Fig 1C). We then tested if

137 normal-like and underdeveloped testes of interspecies hybrids produce any sperm. In squashed  
138 testes of 2-day-old adults of pure species, large amounts of mature spermatozoa with long tails  
139 can be seen. After we crushed the testes, spermatozoa with vibrant motility escaped from the  
140 ruptures (Fig 1A, S1 Movie). However, mature sperm or sperm motility hardly could be seen in  
141 squashed or crushed normal-like testes of 2-day-old adult hybrids from crosses when *An. merus*  
142 was the mother. Instead, we see delayed spermatid differentiation, fewer spermatids, and mostly  
143 nonmotile spermatozoa with large heads and often two short tails growing from opposite ends of  
144 the head (Fig 1B, S2 Movie). Only undifferentiated round cells could be seen in underdeveloped  
145 testes of hybrids from reciprocal crosses when *An. merus* was the father (Fig 1C). Given the  
146 small size of the degenerate testes, these round cells may represent germline stem cells. Thus,  
147 neither normal-like nor underdeveloped testes of the interspecies hybrids produce mature motile  
148 spermatozoa.

149

### 150 **The normal progress of meiosis in males of pure species**

151 Before we investigate meiosis of interspecies hybrids, we provide the first description of  
152 chromosome behavior in meiosis of pure *Anopheles* species. The chromosome complement of  
153 *Anopheles* males consists of three chromosome pairs: two autosomes (2 and 3) and X and Y sex  
154 chromosomes. With the help of sex-chromosome-specific fluorescent probes, we followed the  
155 progress of meiosis in *An. gambiae*, *An. coluzzii*, and *An. merus*. The following DNA sequences  
156 were used as the probes for fluorescence *in situ* hybridization (FISH) (Table 1). Retroelement  
157 *zanzibar* is specific to the Y chromosome of *An. gambiae* and *An. coluzzii* but is absent in *An.*  
158 *merus*; 18S ribosomal DNA (rDNA) labels only the X chromosome in *An. gambiae* or *An.*  
159 *coluzzii* but labels both X and Y chromosomes in *An. merus*; and satellite AgY53B [43] labels

160 both X and Y chromosomes in all three species [44]. Fig 2 shows normal activities of meiotic  
161 chromosomes in testes of *An. gambiae* ZANU. In primary spermatocytes, all homologous  
162 autosomes and sex chromosomes pair and display chiasmata in diplotene/diakinesis of prophase  
163 I, they align with each other at the cell equator in metaphase I, and then move from each other in  
164 anaphase I. In secondary spermatocytes, sister chromatids of each chromosome align with each  
165 other at the cell equator in metaphase II and go to opposite poles of the cell during anaphase II.  
166 Meiotic divisions produce spermatids that contain a haploid set of autosomes and either a Y or X  
167 chromosome. *An. coluzzii* males show similar morphology and behavior of chromosomes during  
168 meiosis (S1 Fig). Because retroelement *zanzibar* is absent in *An. merus*, we used satellite  
169 AgY53B and 18S rDNA to label sex chromosomes in this species. Each of these probes  
170 hybridized with both X and Y chromosomes in *An. merus*, making discrimination between X and  
171 Y more difficult in this species. However, we could differentiate metaphase sex chromosomes by  
172 the euchromatic arm of the X chromosome and by the slightly larger distal heterochromatic  
173 block of the Y chromosome (S2 Fig). Heterochromatic parts of the X and Y chromosomes are  
174 relatively large and structurally similar in *An. merus* in comparison with *An. gambiae* or *An.*  
175 *coluzzii*. In the latter two species, the heterochromatic parts of the X and Y chromosomes are  
176 relatively small and substantially different from each other both in size and genetic content [44].  
177 Despite these differences between *An. merus* and either *An. gambiae* or *An. coluzzii*, the  
178 activities of meiotic sex chromosomes in testes are similar in all three species.

179

180 **Table 1. Genomic sequences and primers used for FISH and RT-PCR.**

| Name     | GenBank ID | VectorBase ID | Forward and reverse primer sequences | Reference  |
|----------|------------|---------------|--------------------------------------|------------|
| 18S rDNA | AM157179   | AGAP028978    | F: AACTGTGGAAAAGCCAGAGC              | This study |



|                   |           |            |                            |            |
|-------------------|-----------|------------|----------------------------|------------|
|                   |           |            | R: TCCAATTGATCCTTGCAAAA    |            |
| <i>zanzibar</i>   | KP878482  |            | F: TTCTTCGATGTTGTGCTGGA    | [44]       |
|                   |           |            | R: ATGGAGAAACAGGGCAACAA    |            |
|                   |           |            | F: TTGGCATTTCATCTGTCCAAA   |            |
|                   |           |            | R: GCACCCTTGATCTCATGTCA    |            |
| <b>AgY53B</b>     | AY754156  |            | F: CCTTTAAACACATGCTCAAATT  | [43]       |
|                   |           |            | R: GTTTCTTCATCCTTAAAGCCTAG |            |
| <i>vasa</i>       | AY957503  | AGAP008578 | F: TTCTGCTGAGGTGCTTAGCG    | This study |
|                   |           |            | R: CGTCTCCGCTCATGTTTCCT    |            |
| <i>β2-tubulin</i> | XM_314718 | AGAP008622 | F: GTACGTGCCGGATCATTTCG    | This study |
|                   |           |            | R: GGCCAGTTTGCAAATGCACTA   |            |
| <i>Ams</i>        | FJ869235  | AGAP029148 | F: CATACGGGAGGTGAGGAAAT    | [45]       |
|                   |           |            | R: CCCCTTCATGCTTCATCTT     |            |
| <i>mts</i>        | FJ869236  | AARA006451 | F: TGGGATCCAAATTATTTTCGTG  |            |
|                   |           |            | R: CTGTTCCGGTTCAACAATGGA   |            |
| <i>Dzip11</i>     | FJ869237  | AGAP001165 | F: GGCCAAAGTGATACAAATTGTTT |            |
|                   |           |            | R: CGTTTCCAATAGGGACTTCG    |            |
| <i>AgS7</i>       | L20837    | AGAP010592 | F: AGAACCAGCAGACCACCATC    | [46]       |
|                   |           |            | R: GCTGCAAACCTTCGGCTATTC   |            |

181

182

### 183 **Meiotic failures in F1 males of interspecies hybrids**

184 To determine possible cytogenetic mechanisms of hybrid male sterility, we analyzed

185 chromosome behavior in testes of hybrids from interspecies crosses. Meiotic chromosomes were

186 present in normal-like testes of hybrids from the ♀*An. merus* × ♂*An. coluzzii/An. gambiae*

187 crosses and we identified important abnormalities of meiosis in these males (Fig 3). In primary  
188 spermatocytes, homoeologous autosomes pair and form chiasmata in prophase I as in pure  
189 species, but X and Y chromosomes do not display chiasmata in diplotene/diakinesis of prophase  
190 I. We found this pattern consistent in all analyzed hybrid males. In hybrids, metaphase  
191 chromosomes are visibly longer than at the same stage in pure species, indicating insufficient  
192 chromatin condensation. Besides, homoeologous chromosomes in hybrids do not segregate  
193 during anaphase. Instead, sister chromatids move to opposite poles of the dividing cell. Because  
194 reductional division does not occur in hybrid males, both X and Y chromatids move to the same  
195 pole during anaphase. As a result, haploid secondary spermatocytes do not form in these males.  
196 Our FISH analysis demonstrated that each spermatid in testes of pure species normally contains  
197 either an X or Y chromosome. In contrast, we found that both X and Y chromosomes present in  
198 each spermatid of the hybrids (S3 Fig). Moreover, the abnormal spermatids are larger in size due  
199 to insufficient chromatin condensation and the double chromosome content. Thus, we discovered  
200 that chromosomes in normal-like testes of hybrid males start with a meiotic behavior in prophase  
201 and then switch to a mitotic behavior in anaphase. The equational division of primary  
202 spermatocytes results in dysfunctional diploid sperm in hybrids if *An. merus* is the mother. In  
203 contrast, degenerate testes of F1s from the reciprocal ♀*An. coluzzii/gambiae* × ♂*An. merus*  
204 crosses have only undifferentiated round germline stem cells. To visualize sex chromosomes, we  
205 performed whole-mount FISH with labeled 18S rDNA and satellite AgY53B to mark the X  
206 chromosomes of *An. coluzzii* and the Y chromosomes of *An. merus*, respectively (S4 Fig). Only  
207 interphase sex chromosomes in nuclei of germline stem cells are detected indicating that meiosis  
208 does not start in the underdeveloped testes of F1 hybrids if *An. merus* is the father. Thus, the  
209 premeiotic arrest in the degenerate testes is the reason for the lack of spermatids in these hybrids.

210

## 211 **Chromosomal and molecular abnormalities in interspecies hybrids**

212 Here, we performed quantitative analyses of chromatin condensation and the X-Y chromosome  
213 pairing in pure species and their hybrids. We also tested if germline-specific genes express in  
214 sterile male hybrids from the reciprocal crosses. To determine the extent of chromatin  
215 condensation in normal-like testes of interspecies hybrids in comparison with pure species, we  
216 measured the lengths of metaphase chromosomes (S1 Table). The results of a statistical analysis  
217 with a two-sample pooled *t*-test show that chromosomes in F1 hybrids are typically longer than  
218 chromosomes in *An. coluzzii*, *An. gambiae*, or *An. merus* (Fig 4A, S5 Fig). For example,  
219 chromosomes of the *An. merus* origin in a hybrid background always show significant ( $P < 0.001$ )  
220 elongation by at least 1.3 times in comparison with pure *An. merus*. The X chromosome of *An.*  
221 *merus* suffered the most serious undercondensation in hybrids exceeding the length of the X  
222 chromosome in the pure species background by 1.6-1.9-fold. Probably because the *An. merus* X  
223 is the longest chromosome in the hybrid karyotype, it can be subject to segregation delays during  
224 anaphase (S6 Fig), possibly causing slowing down of the cell division.

225

226 In our cytogenetic study of interspecies hybrids, the X and Y chromosomes do not show pairing  
227 or chiasmata in diplotene/diakinesis of prophase I (Fig 3). We hypothesized that sex  
228 chromosome pairing is affected in the early prophase I when individual chromosomes cannot be  
229 distinguished by direct visualization. To analyze the X-Y chromosome pairing at the pachytene  
230 stage of prophase I, we performed a whole-mount FISH and examined spatial positions of the X-  
231 and Y-specific fluorescent signals in confocal optical sections of nuclei in testes of pure species  
232 and their hybrids (S7 Fig). We recorded the number of nuclei with X and Y fluorescent signals

233 colocalized versus X and Y fluorescent signals located separately (Fig 4B). The results of a  
234 statistical analysis with a two-sample pooled *t*-test demonstrate that X and Y chromosomes pair  
235 in more than 90% of primary spermatocytes in the *An. coluzzii*, while they pair in less than 30%  
236 of primary spermatocytes in F1 hybrids of ♀*An. merus* × ♂*An. coluzzii* (Fig 4C).

237

238 To test if premeiotic or meiotic failures are associated with the misexpression of germline-  
239 specific genes, we analyzed the presence of the postmitotic germline transcripts *Ams*, *mts*, *Dzip11*  
240 [45], and *β2-tubulin* [47, 48] in F1 hybrid males (Table 1). The reverse transcription polymerase  
241 chain reaction (RT-PCR) results show that these genes express at similar levels in the  
242 reproductive tissues of *An. coluzzii* and F1 hybrids from the ♀*An. merus* × ♂*An. coluzzii* MOPTI  
243 cross (Fig 4D). However, *Ams*, *mts*, *Dzip11*, and *β2-tubulin* are strongly down regulated in  
244 gonads of the ♀*An. coluzzii* MOPTI × ♂*An. merus* F1 hybrids, supporting our observation that  
245 meiosis does not occur in these hybrids. In contrast, a pre-meiotic gene, *vasa* [49] (Table 1),  
246 expresses at similar levels in reproductive tissues of all hybrids and pure species, indicating that  
247 germline stem cells present even in degenerate testes of interspecies hybrids.

248

249 Besides the abnormalities that affect all progeny of the ♀*An. merus* × ♂*An. coluzzii*/*An. gambiae*  
250 crosses, chromosomes of some hybrid individuals were involved in *de novo* genome  
251 rearrangements (Fig 5). For example, a large fragment of the *An. merus* X chromosome,  
252 including the rDNA locus, was translocated to the 2L arm of *An. coluzzii* in the male hybrid from  
253 the ♀*An. merus* × ♂*An. coluzzii* MALI cross (Fig 5A). In addition, we detected a duplication of a  
254 chromosomal segment involving the rDNA locus within the X chromosome of *An. merus* in the  
255 ♀*An. merus* × ♂*An. gambiae* ZANU cross (Fig 5B). These rearrangements were not observed in

256 pure species, and their occurrence in F1 hybrid males suggests an increased genome instability as  
257 a result of interspecies hybridization.

258

## 259 **Discussion**

### 260 **Cellular and molecular phenotypes associated with hybrid male sterility**

261 In this study, we performed the first detailed cytological analysis of spermatogenesis in pure  
262 species and hybrids of mosquitoes. Hybrid male sterility phenotypes in the *An. gambiae* complex  
263 are clearly asymmetric between the reciprocal crosses (Fig 6), as has been demonstrated earlier  
264 for mosquitoes and other animals [8, 20, 30, 50]. The observed cellular and molecular  
265 abnormalities suggest the following developmental scenarios in testes of the interspecies hybrids.  
266 In hybrids from crosses with *An. merus* as the father, mitotic divisions of germline cells are  
267 impaired, no meiosis occurred, and expression of postmitotic germline-specific genes is  
268 repressed (Fig 4D). As a result, these hybrids have degenerate testes with arrested germline stem  
269 cells. Degenerate testes have also been observed in F1 hybrids between sibling species of the *An.*  
270 *albitarsis* [51] and the *An. barbirostris* [52] complexes. However, in hybrids from the reciprocal  
271 crosses with *An. merus* as the mother, mitotic divisions of germ cells occur as normally as in  
272 pure species. Moreover, germ cells in these hybrids go through meiotic prophase I as evidenced  
273 from our cytogenetic analyses (Fig 3) and expression of the postmitotic germline genes (Fig 4D).  
274 However, the downstream developmental processes in these hybrids are impaired. The  
275 abnormalities begin in meiosis I where homoeologous chromosomes fail to segregate. Testes of  
276 these hybrids show delayed spermatid differentiation, a smaller number of these cells, and  
277 eventual formation of immotile abnormal (including two-tailed) sperm with insufficient  
278 chromatin condensation (Fig 6). Thus, we demonstrate that premeiotic and meiotic failures

279 associate with hybrid male sterility in malaria mosquitoes. This observation is at odds with the  
280 commonly accepted view that more often hybrid males suffer postmeiotic sterility problems [1,  
281 2]. Although many postmeiotic defects seen in *Drosophila* hybrids are indeed related to  
282 problems in sperm bundling and motility [2, 19, 23], some sperm abnormalities may stem from  
283 meiotic failures. For example, our results demonstrate that such sperm abnormalities as  
284 nonmotility, two-tailed heads, and chromatin decompaction in sperm heads result from the  
285 impaired meiosis I. However, very few studies have been devoted to the detailed cytological  
286 investigation of meiosis in interspecies hybrids, especially in dipteran insects. The closest studies  
287 to our own were performed by Theodosius Dobzhansky in 1933 and 1934, in which he described  
288 pronounced defects in meiosis I in sterile male hybrids from the ♀*D. pseudoobscura* × ♂*D.*  
289 *persimilis* cross [20, 21]. Also, a histological investigation of spermatogenesis in hybrid mice  
290 identified defects in meiosis I as a primary barrier to reproduction [18]. Additional studies of  
291 interspecies hybrids of various organisms should determine if the first meiotic division  
292 commonly fails when fertility is affected.

293

#### 294 **Cytogenetic mechanisms of hybrid male sterility**

295 Our cytogenetic investigation of meiosis in pure *Anopheles* species revealed that the X and Y  
296 chromosomes normally pair tightly with each other throughout prophase I (Figs 2, 4BC, and S1,  
297 S2 Figs). Sex chromosomes in malaria mosquito males genetically recombine [44] highlighting  
298 an important difference from male meiosis in fruit flies [53-55]. As a result of the recombination,  
299 some mosquito species, such as *An. merus*, have homomorphic heterochromatic parts in their X  
300 and Y chromosomes (S2 Fig). Future sequencing and assembly of the heterochromatin in malaria

301 mosquitoes using long reads may yield important insights into structural and functional  
302 organization of the sex chromosomes, as it has been demonstrated for *Drosophila* [56].  
303  
304 Unlike pure species, the meiotic prophase I in F1 mosquito hybrids shows cytogenetic  
305 anomalies—low percentage of the X-Y chromosome pairing and insufficient chromatin  
306 condensation (Fig 7). Disruption of chromosome pairing and synapsis is frequently observed in  
307 interspecies hybrids of various organisms. Similar to the mosquitoes, pairing of X and Y  
308 chromosomes is more adversely affected than that of autosomes during the prophase I in male  
309 hybrids between Campbell's dwarf hamster and the Djungarian hamster [57]. A recent work has  
310 clarified that the autosomes of male hybrids between these hamster species undergo pairing and  
311 recombination as normally as their parental forms do, but the heterochromatic arms of the X and  
312 Y chromosomes show a high frequency of asynapsis and recombination failure [58]. Another  
313 study has demonstrated a high rate of synaptic aberrations in multiple chromosomes of male  
314 hybrids between two chromosome races of the common shrew [59]. It has been proposed that  
315 asynapsis of heterospecific chromosomes in prophase I may provide a recurrently evolving  
316 trigger for the meiotic arrest of interspecific F1 hybrids of mice [8, 16]. Indeed, the presence of  
317 chiasmata and tension exerted across homologs ensures that yeast cells undergo reductional  
318 segregation [60]. Whenever it occurs, an asynapsis of chromosomes almost invariably triggers  
319 pachytene checkpoint and meiotic breakdown [61]. The genetic determinants of chromosome  
320 pairing and synapsis in both plants and animals are of great interest. In bread wheat, the *Ph1*  
321 locus has the largest effect on preventing homeologous pairing in meiosis [62]. In mice, a null  
322 mutation in the *PRDM9* gene causes chromosome asynapsis, arrest of spermatogenesis at  
323 pachynema, impairment of double-strand break repair, and disrupted sex-body formation [63].

324 The *PRDM9*-null phenotype resembles observed univalents and frequent X-Y dissociation in  
325 interspecies hybrids of mice [17]. A recent study has demonstrated a genetic link between  
326 meiotic recombination and hybrid male sterility [12]. It has been suggested that within species  
327 there may be selection to maintain sequence homozygosity for meiosis genes because their  
328 divergence can lead to reproductive isolation through failures of double-strand break formation  
329 and synapsis in hybrids [62].

330

331 It is possible that the absence of chiasmata between the X and Y chromosomes causes failure of  
332 reductional segregation in the mosquito hybrids. Unlike hybrids of mice, primary spermatocytes  
333 in the mosquito hybrids do not undergo arrest in meiosis I. Instead, they continue dividing by  
334 mitosis, in which sister chromatids move to the opposite poles of the dividing cell (Fig 7). This  
335 meiosis-mitosis switch is likely caused by the bi-orientation instead of the normal mono-  
336 orientation of sister kinetochores, in which tension across the centromere regions and proteins  
337 shugoshins plays a key role [53, 64, 65]. It is known that kinetochore-microtubules attachment  
338 errors are more commonly found in meiosis I than in mitosis [66, 67]. A mathematical model  
339 explains why kinetochore-microtubules attachment errors occur more frequently in the first  
340 meiotic division than in mitosis. The model suggests that the gradual increase of microtubules  
341 may help turn off the spindle assembly checkpoint in meiosis I leading to chromosome mis-  
342 segregation errors [68]. In mosquito hybrids, change in the orientation of sister kinetochores may  
343 be caused by reduced tension across the centromeres of homologous chromosomes due to  
344 chromatin decompaction. Changes in chromatin condensation have been documented in  
345 interspecies hybrids of diverse groups of organisms [69, 70]. In a study of F1 hybrids between  
346 *Arabidopsis thaliana* and *A. lyrata*, the *A. thaliana* chromatin became more compact, whereas



347 the *A. lyrata* chromatin became moderately less compact [70]. An intriguing spatial arrangement  
348 model suggests that that Y chromosome-linked variation may alter spatial position and  
349 packaging of other chromosomes in the nucleus [71]. Chromosome condensation and spatial  
350 position could also be affected in mosquito hybrids by improper function of condensins. A study  
351 of *Drosophila* male meiosis demonstrated that condensin II subunits, Cap-H2 and Cap-D3, are  
352 required to promote chromosome territory formation in primary spermatocyte nuclei. Moreover,  
353 anaphase I is abnormal in Cap-H2 mutants as chromatin bridges are formed between segregating  
354 heterologous and homologous chromosomes [72]. Thus, the interplay between the two  
355 phenotypes in mosquito hybrids—sex chromosome unpairing and chromatin decompaction—  
356 may result in failing a reductional meiotic division and proceeding to an equational mitotic  
357 division.

358

### 359 **Evolution of spermatogenesis errors in interspecies hybrids**

360 Reciprocal crosses in malaria mosquitoes and other organisms usually produce hybrids with  
361 sterility phenotypes of different degrees of severity [20, 30, 50]. This observation suggests that  
362 multiple stages of postzygotic isolation exist based on malfunction of the spermatogenesis. At  
363 the early stages of evolution, germline-specific genes still express normally and meiosis proceeds  
364 until metaphase I and then switches to an equational anaphase producing diploid sperm cells in  
365 hybrids. In this case, meiotic errors are characterized by the dramatically decreased pairing  
366 between sex chromosomes and insufficient chromatin condensation, which are seen in sterile  
367 hybrids from the ♀*An. merus* × ♂*An. coluzzii*/*An. gambiae* crosses (Figs 3, 7). The observed  
368 incidental chromosome rearrangements in mosquito hybrids (Fig 5) support the notion that  
369 genome instability is a common characteristic trait of hybrid incompatibility that may be

370 associated with increased transposable element activity, ectopic recombination, and double-  
371 strand DNA breaks [73]. A recent work demonstrated that biogenesis of Piwi-interacting RNA  
372 (piRNA) is enhanced in testes of hybrids between *Drosophila buzzatii* and *D. koepferae*. The  
373 study argues that interspecies hybridization causes a genomic stress that can activate the piRNA  
374 response pathway to counteract transposable element deregulation [74]. Because piRNAs  
375 predominantly target long terminal repeats (LTR) retrotransposons in both *Anopheles* and  
376 *Drosophila* [75], future studies of the piRNA expression in mosquito hybrids may identify  
377 common and specific responses to the genomic stress in dipteran insect species. As species  
378 continue to diverge, meiotic errors become more prominent, and new hybrid phenotypes appear  
379 as has been seen, for example, in sterile male hybrids from the ♀*D. pseudoobscura* × ♂*D.*  
380 *persimilis* cross [20, 21]. At this stage of postzygotic isolation, an abnormal anaphase is  
381 characterized by unequal segregation of chromosomes resulting in spermatids with unbalanced  
382 chromosome content. The more advanced interspecies divergence of meiosis is manifested by  
383 the unpairing of the most chromosomes and by the malfunction of the abnormally elongated  
384 spindle in sterile male hybrids [20, 21]. The next stage of evolution is spermatogenic arrest in  
385 early meiosis I with disrupted homoeologous chromosome pairing, meiotic sex chromosome  
386 inactivation, and increased apoptosis of spermatocytes as seen in mice hybrids [16-18].  
387 Interestingly, chromosome unpairing and asynapsis in male hybrids stand out as common  
388 spermatogenic phenotypes associated with sterility. It has been hypothesized that nongenic  
389 repetitive sequences, as the fastest diverging component of the genome, may facilitate asynapsis  
390 in hybrids, thus, representing suitable candidates for a Dobzhansky-Muller incompatibility [16].  
391 Findings in *Drosophila* hybrids demonstrate that rapid evolution of heterochromatin may indeed  
392 result in hybrid incompatibilities [69, 73, 76, 77]. Also, the centromere drive model has been

393 proposed to explain how paired chromosomes at meiosis I can be subject to nondisjunction  
394 leading to infertility in *Drosophila* males [78, 79]. Accordingly, incompatibilities between  
395 rapidly evolving centromeric components of emerging species, such as co-evolving the CENP-A  
396 histone variant and its chaperone CAL1 [80], may account for species incompatibility between  
397 centromeric histones and for postzygotic reproductive isolation. Finally, spermatogenic  
398 abnormalities in hybrids can happen even before meiosis starts. A spermatogenic arrest at the  
399 premeiotic stage is characterized by the repression of germline-specific genes and by the lack of  
400 spermatocytes or spermatids in degenerate testes of hybrid males. These phenotypes have been  
401 observed in sterile hybrids from the ♀*D. mauritiana* × ♂*D. sechellia* cross [19] and in sterile  
402 hybrids from the ♀*An. coluzzii*/*An. gambiae* × ♂*An. merus* crosses (our study). Thus, cytological  
403 analyses of spermatogenesis in interspecies hybrids can associate sterility phenotypes with early  
404 or advance stages of speciation. Such studies of interspecies hybrids from diverse groups of  
405 organisms may highlight general patterns and mechanisms in the origin and evolution of  
406 postzygotic isolation.

407

## 408 **Conclusions**

409 Charles Darwin in the chapter "Hybridism" of his *Origin of Species* rightly argued that hybrid  
410 sterility “is not a specially endowed quality, but is incidental on other acquired differences  
411 [81].” Identification of the cellular and molecular differences acquired during the early stages of  
412 postzygotic isolation between species is crucial to explaining both speciation and normal fertility  
413 function. The cross between a female *An. merus* and a male *An. gambiae* or *An. coluzzii* produces  
414 sterile hybrid males with spermatogenic abnormalities in the first meiotic division. Our study  
415 uncovered differences in chromosome behaviors between pure *Anopheles* species and their

416 hybrids. The obtained data suggest that the meiotic abnormalities in hybrid males stem from the  
417 unpairing of the sex chromosomes and chromatin decondensation. Therefore, these malaria  
418 mosquitoes represent a great new system for studying a genetic basis and molecular mechanisms  
419 of species incompatibilities at early stages of postzygotic reproductive isolation.

420

421 Knowledge of the mechanisms of reproductive isolation in *Anopheles* has important implications  
422 not only for evolutionary biology but also for malaria control. The success of malaria  
423 transmission highly depends on the rate of mosquito reproduction. The development of novel  
424 approaches to control the reproductive output of mosquitoes must include the understanding of  
425 how fertility is regulated. Determining the mechanisms of sterility in male hybrids between  
426 closely related species of mosquitoes can also empower the sterile insect technique. In this  
427 respect, our results shed new light on the cellular processes and possible mechanisms in  
428 spermatogenesis that first appear when fertility is affected.

429

## 430 **Materials and Methods**

431

### 432 **Mosquito maintenance and crossing experiments**

433 The laboratory colonies of *An. gambiae* ZANU (MRA-594), *An. coluzzii* MOPTI (MRA-763),  
434 *An. coluzzii* MALI (MRA-860), and *An. merus* MAF (MRA-1156) were obtained from the  
435 Biodefense and Emerging Infections Research Resources Repository (BEI). Authentication of  
436 the species was performed by a cytogenetic analysis and by PCR diagnostics [82, 83].

437 Mosquitoes were reared at  $27\pm 1^\circ\text{C}$ , with 12-hour photoperiod and  $70\pm 5\%$  relative humidity.

438 Larvae were fed fish food, and adult mosquitoes were fed 1% sugar water. To induce

439 oviposition, females were fed defibrinated sheep blood (Colorado Serum Co., Denver, Colorado,  
440 USA) using artificial blood feeders. To perform interspecies crosses, male and female pupae  
441 were separated to guarantee virginity of adult mosquitoes. We differentiated males and females  
442 at the pupal stage using sex-specific differences in the shape of their terminalia [84]. After the  
443 emergence of adults, crossing experiments were performed by combining 30 females and 15  
444 males in one cage. Five days after random mating, the females were fed sheep blood. Two days  
445 later, an egg dish, covered with moist filter paper to keep the eggs from drying out, was put into  
446 the cage. Backcrosses of F1 males and parental females were done using a similar method. At  
447 least two blood meals were fed to females with three repeats of each crosses.

448

#### 449 **Male gonad and sperm observation**

450 Male gonads were dissected and photographed using an Olympus SZ 61 stereoscopy microscope  
451 (Olympus, Tokyo, Japan) with an Olympus Q-Color 5 digital camera (Olympus, Tokyo, Japan).  
452 We observed the testes of 30 males and took pictures of the testes of five males from each cross.  
453 For sperm observation, testes were mounted in 20  $\mu$ l sperm assay buffer containing 4 mM KCl,  
454 1.3 mM CaCl<sub>2</sub>, 145 mM NaCl, 5 mM D-glucose, 1 mM MgCl<sub>2</sub>, and 10 mM 4-(2-hydroxyethyl)-  
455 1-piperazineethanesulfonic acid (Hepes) [85]. After gently covering testes with a coverslip, they  
456 were crushed, and sperm motility was observed under a phase contrast microscope BX 41  
457 (Olympus, Tokyo, Japan). A Movie of sperm motility for at least five males of hybrids from each  
458 cross and five males of pure species was recorded using a digital camera UC90 (Olympus,  
459 Tokyo, Japan).

460

#### 461 **Chromosome preparation**

462 Testes with male accessory glands were dissected from male pupae and 0-12 hours-old adults in  
463 0.075% potassium chloride (KCl) hypotonic solution on a frosted glass slide (Thermo Fisher  
464 Scientific, Waltham, MA, USA) under an Olympus SZ 61 dissecting microscope (Olympus,  
465 Tokyo, Japan). To observe meiotic chromosomes, male accessory glands and other tissues were  
466 removed, and only testes were left on the slide. Immediately after dissection, a drop of 50%  
467 propionic acid was added to the testes, and they were covered with a 22×22-mm coverslip  
468 (Thermo Fisher Scientific, Waltham, MA, USA). Preparations were tapped using the flat rubber  
469 end of a pencil and observed under an Olympus CX41 phase-contrast microscope (Olympus,  
470 Tokyo, Japan). The slides were frozen in liquid nitrogen, and a sharp razor was used to take off  
471 the coverslips. The preparations were placed in 50% ethanol chilled at -20°C for a minimum of 2  
472 hours. Later, serial dehydrations were performed in 70%, 90%, and 100% ethanol for 5 min each  
473 at room temperature (RT). Subsequently, the best preparations from at least 10 slides/individuals  
474 with desired meiotic stages were chosen for further studies.

475

#### 476 **DNA probe labeling and FISH**

477 Three DNA probes were used in this study: retroelement *zanzibar*, which is specific to the Y  
478 chromosome of *An. gambiae* and *An. coluzzii*, 18S rDNA, which is specific to the X  
479 chromosome of *An. gambiae* and *An. coluzzii* but labels both X and Y chromosomes of *An.*  
480 *merus*, and satellite AgY53B, which labels X and Y chromosomes of all three species [44]. The  
481 AgY53B satellite was amplified using primers that target the AgY53B/AgY477 satellite array  
482 (Table 1). The probes were labeled by Cy3 or Cy5 fluorochromes using PCR with genomic DNA  
483 as a template. Genomic DNA was extracted using DNeasy Blood & Tissue Kits (Qiagen, Hilden,  
484 Germany) from virgin males of *An. gambiae* ZANU or *An. coluzzii* MOPTI for labeling

485 *zanzibar*, virgin males of *An. merus* MAF for labeling satellite AgY53B, and virgin females of  
486 *An. gambiae* or *An. coluzzii* for labeling 18S rDNA. Each 25 µl of a PCR mix consisted of 1-µl  
487 genomic DNA, 12.5-µl ImmoMix™ 2x reaction mix (Bioline USA Inc., Taunton, MA, USA), 1  
488 µl of 10-µM forward and reverse primers, and water. PCR labeling was performed in the  
489 Mastercycler® pro PCR thermocycler (Eppendorf, Hamburg, Germany) starting with a 95°C  
490 incubation for 10 min followed by 35 cycles of 95°C for 30 sec, 52°C for 30 sec, 72°C for 45  
491 sec; 72°C for 5 min, and a final hold at 4°C. FISH was performed as previously described [86,  
492 87]. Briefly, slides with good preparations were treated with 0.1-mg/ml RNase at 37°C for 30  
493 min. After washing with 2×SSC for 5 min twice, slides were digested with 0.01% pepsin and  
494 0.037% HCl solution for 5 min at 37°C. After washing slides in 1×PBS for 5 min at RT two  
495 times, preparations were fixed in 3.7% formaldehyde for 10 min at RT. Slides were then washed  
496 in 1×PBS and dehydrated in a series of 70%, 80%, and 100% ethanol for 5 min at RT. Then 10  
497 µl of probes were mixed, added to the preparations, and incubated at 37°C overnight. After  
498 washing slides in 1×SSC at 60°C for 5 min, 4×SSC/NP40 solution at 37°C for 10 min, and  
499 1×PBS for 5 min at RT, preparations were counterstained with a DAPI-antifade solution (Life  
500 Technologies, Carlsbad, CA, USA) and kept in the dark for at least 2 hours before visualization  
501 with a fluorescent microscope.

502

### 503 **Cytogenetic analyses**

504 Cytogenetic analyses of meiotic and mitotic stages and of behaviors of FISH-labeled  
505 chromosomes were performed on at least 10 male individuals of each pure species and of each  
506 hybrid. To visualize and photograph meiotic chromosomes after FISH, we used an Olympus  
507 BX61 microscope (Olympus, Tokyo, Japan) with a connected camera Olympus U-CMAD3

508 (Olympus, Tokyo, Japan). Lengths of well-spread 10 metaphase I chromosomes of each species  
509 and of each hybrid were measured using the ruler tool in Adobe Photoshop CS6 (Adobe Inc., San  
510 Jose, CA, USA). Since the variances for both groups were equal, a statistical two-sample pooled  
511 *t*-test was done with the JMP 13 software (SAS Institute Inc., Cary, NC, USA).

512

### 513 **Whole-mount FISH and analysis of chromosome pairing**

514 Testes from one-day-old adults of pure species and hybrids were dissected in 1×PBS solution  
515 and fixed in 3.7% paraformaldehyde in 1×PBS with 0.1% tween-20 (PBST) for 10 min at room  
516 temperature. After incubation with 0.1-mg/ml RNase for 30 min at 37 °C, testes were penetrated  
517 with 1% triton/0.1M HCl in PBST for 10 min at room temperature. After adding labeled DNA  
518 probes, testes were incubated at 75 °C for 5 min (denaturation) and 37 °C overnight  
519 (hybridization). Later, testes were washed with 2×SSC and mounted with a DAPI-antifade  
520 solution (Life Technologies, Carlsbad, CA, USA). Testes from 6 individuals of pure species and  
521 of hybrids were scanned and analyzed. Visualization and z-tack 3D scanning were performed on  
522 the whole testes with an interval of 1.25 μm between two optical sections under a 63× oil lens of  
523 Zeiss LSM 880 confocal laser scanning microscope (Carl Zeiss AG, Oberkochen, Germany).  
524 Based on the size of the testis cells and on the limitations of microscope imaging, we chose from  
525 the first to sixteenth optical layers with strong and clearly detected fluorescent signals to analyze  
526 sex-chromosome-pairing events. Specifically, cell nuclei at the early stages of meiotic prophase I  
527 from 4<sup>th</sup>±1, 8<sup>th</sup>±1, and 12<sup>th</sup>±1 optical layers were used to count pairing events. A total of 418 and  
528 489 nuclei at the early stages of meiotic prophase I were analyzed for pairing and unpairing of the  
529 sex chromosomes in pure species and hybrids, respectively (S2 Table). The percentage of the  
530 numbers of cells with pairing and no pairing of sex chromosomes was used to compare parental



531 species and hybrids. Since the variances for both groups were equal, a statistical two-sample  
532 pooled *t*-test was done using the JMP 13 software (SAS Institute Inc., Cary, NC, USA).

533

### 534 **RNA extraction and RT-PCR**

535 RNA was extracted from 40 abdomens (only distal segments that include testes) and from 20  
536 carcasses of 1- to 2-day-old virgin adult males of *An. coluzzii* MOPTI, as well as of interspecies  
537 hybrids from crosses ♀*An. coluzzii* MOPTI × ♂*An. merus* and ♀*An. merus* × ♂*An. coluzzii*  
538 MOPTI using a Direct-Zol™ RNA MiniPrep Kit (Zymo Research, Irvine, California, US).

539 cDNA for selected genes (Table 1) was generated in a 40-μl reaction that contained 8 μl of 5×  
540 first-strand buffer, 4 μl of 0.1-M dithiothreitol (DTT), 2 μl of 50-μM random hexamer primer  
541 (Thermo Fisher Scientific, Waltham, MA, USA), 1 μl of 25-mM dNTP mix solution (Thermo  
542 Fisher Scientific, Waltham, MA, USA), 1 μl of 40-U/μl RNAsin (Promega, Madison, WI, USA),  
543 2 μl of 200-U/μl M-MLV Reverse Transcriptase (Thermo Fisher Scientific, Waltham, MA,  
544 USA), 1ng to 2μg of RNA and water. After incubation at 42°C for 1h, the reaction was stopped  
545 by incubation at 95°C for 5 min. Two-step RT-PCR was performed to analyze the gene  
546 expression. Each 25-μl PCR mix consisted of 1-μl cDNA, 12.5-μl ImmoMix™ 2× reaction-mix  
547 (Bioline USA Inc., Taunton, MA, USA), 1 μl of 10-μM forward and reverse primers, and water.  
548 PCR was performed in the Mastercycler® pro PCR thermocycler (Eppendorf, Hamburg,  
549 Germany) starting with a 95°C incubation for 10 min followed by 35 cycles of 95°C for 30 sec,  
550 57°C for 30 sec, 72°C for 30 sec; 72°C for 10 min; and a final hold at 4°C. Amplification  
551 products were visualized in a 1-1.5% agarose gel.

552

### 553 **Acknowledgments**

554 We thank the Malaria Research and Reference Reagent Resource (MR4) at the BEI for providing  
555 us the laboratory colonies of malaria mosquitoes and Melissa Wade for proofreading the text.

556

## 557 **References**

558 1. Powell JR. Progress and Prospects in Evolutionary Biology. New York - Oxford: Oxford  
559 University Press; 1997. 562 p.

560 2. Coyne JA, Orr HA. Speciation. Sunderland, Mass.: Sinauer Associates; 2004. xiii, 545, 2  
561 pages of plates p.

562 3. Larson EL, VaLnderpool D, Sarver BAJ, Callahan C, Keeble S, Provencio LL, et al. The  
563 Evolution of Polymorphic Hybrid Incompatibilities in House Mice. *Genetics*. 2018;209(3):845-  
564 59. Epub 2018/04/26. doi: 10.1534/genetics.118.300840. PubMed PMID: 29692350; PubMed  
565 Central PMCID: PMC6028243.

566 4. Good JM, Dean MD, Nachman MW. A complex genetic basis to X-linked hybrid male  
567 sterility between two species of house mice. *Genetics*. 2008;179(4):2213-28. Epub 2008/08/12.  
568 doi: 10.1534/genetics.107.085340. PubMed PMID: 18689897; PubMed Central PMCID:  
569 PMC6028243.

570 5. White MA, Stubbings M, Dumont BL, Payseur BA. Genetics and evolution of hybrid  
571 male sterility in house mice. *Genetics*. 2012;191(3):917-34. Epub 2012/05/05. doi:  
572 10.1534/genetics.112.140251. PubMed PMID: 22554891; PubMed Central PMCID:  
573 PMC6028243.

574 6. Fishman L, Stathos A, Beardsley PM, Williams CF, Hill JP. Chromosomal  
575 rearrangements and the genetics of reproductive barriers in *mimulus* (monkey flowers).

- 576 Evolution. 2013;67(9):2547-60. Epub 2013/09/17. doi: 10.1111/evo.12154. PubMed PMID:  
577 24033166.
- 578 7. Leppala J, Savolainen O. Nuclear-cytoplasmic interactions reduce male fertility in  
579 hybrids of *Arabidopsis lyrata* subspecies. Evolution. 2011;65(10):2959-72. Epub 2011/10/05.  
580 doi: 10.1111/j.1558-5646.2011.01361.x. PubMed PMID: 21967435.
- 581 8. Bhattacharyya T, Reifova R, Gregorova S, Simecek P, Gergelits V, Mistrik M, et al. X  
582 chromosome control of meiotic chromosome synapsis in mouse inter-subspecific hybrids. PLoS  
583 Genet. 2014;10(2):e1004088. Epub 2014/02/12. doi: 10.1371/journal.pgen.1004088. PubMed  
584 PMID: 24516397; PubMed Central PMCID: PMC3916230.
- 585 9. Dobzhansky T. Studies on Hybrid Sterility. II. Localization of Sterility Factors in  
586 *Drosophila Pseudoobscura* Hybrids. Genetics. 1936;21(2):113-35. Epub 1936/03/01. PubMed  
587 PMID: 17246786; PubMed Central PMCID: PMC1208664.
- 588 10. Turissini DA, Liu G, David JR, Matute DR. The evolution of reproductive isolation in the  
589 *Drosophila yakuba* complex of species. J Evol Biol. 2015;28(3):557-75. Epub 2015/01/23. doi:  
590 10.1111/jeb.12588. PubMed PMID: 25611516.
- 591 11. Hu XS, Filatov DA. The large-X effect in plants: increased species divergence and  
592 reduced gene flow on the *Silene* X-chromosome. Mol Ecol. 2016;25(11):2609-19. Epub  
593 2015/10/20. doi: 10.1111/mec.13427. PubMed PMID: 26479725.
- 594 12. Balcova M, Faltusova B, Gergelits V, Bhattacharyya T, Mihola O, Trachtulec Z, et al.  
595 Hybrid Sterility Locus on Chromosome X Controls Meiotic Recombination Rate in Mouse.  
596 PLoS Genet. 2016;12(4):e1005906. Epub 2016/04/23. doi: 10.1371/journal.pgen.1005906.  
597 PubMed PMID: 27104744; PubMed Central PMCID: PMC4841592.

- 598 13. Slotman M, Della Torre A, Powell JR. The genetics of inviability and male sterility in  
599 hybrids between *Anopheles gambiae* and *An. arabiensis*. *Genetics*. 2004;167(1):275-87. Epub  
600 2004/05/29. doi: 167/1/275 [pii]. PubMed PMID: 15166154; PubMed Central PMCID:  
601 PMC1470845.
- 602 14. Phadnis N, Orr HA. A Single Gene Causes Both Male Sterility and Segregation  
603 Distortion in *Drosophila* Hybrids. *Science*. 2009;323(5912):376-9. doi:  
604 10.1126/science.1163934. PubMed PMID: WOS:000262481400037.
- 605 15. Ting CT, Tsaur SC, Wu ML, Wu CI. A rapidly evolving homeobox at the site of a hybrid  
606 sterility gene. *Science*. 1998;282(5393):1501-4. doi: DOI 10.1126/science.282.5393.1501.  
607 PubMed PMID: WOS:000077110800058.
- 608 16. Bhattacharyya T, Gregorova S, Mihola O, Anger M, Sebestova J, Denny P, et al.  
609 Mechanistic basis of infertility of mouse intersubspecific hybrids. *Proc Natl Acad Sci U S A*.  
610 2013;110(6):E468-77. Epub 2013/01/19. doi: 10.1073/pnas.1219126110. PubMed PMID:  
611 23329330; PubMed Central PMCID: PMC3568299.
- 612 17. Forejt J, Ivanyi P. Genetic studies on male sterility of hybrids between laboratory and  
613 wild mice (*Mus musculus* L.). *Genet Res*. 1974;24(2):189-206. Epub 1974/10/01. PubMed  
614 PMID: 4452481.
- 615 18. Schwahn DJ, Wang RJ, White MA, Payseur BA. Genetic Dissection of Hybrid Male  
616 Sterility Across Stages of Spermatogenesis. *Genetics*. 2018. Epub 2018/10/20. doi:  
617 10.1534/genetics.118.301658. PubMed PMID: 30333190.
- 618 19. Kulathinal R, Singh RS. Cytological Characterization of Premeiotic Versus Postmeiotic  
619 Defects Producing Hybrid Male Sterility among Sibling Species of the *Drosophila Melanogaster*

- 620 Complex. Evolution. 1998;52(4):1067-79. Epub 1998/08/01. doi: 10.1111/j.1558-  
621 5646.1998.tb01834.x. PubMed PMID: 28565214.
- 622 20. Dobzhansky T. Studies on hybrid sterility. I. Spermatogenesis in pure and hybrid  
623 *Drosophila pseudoobscura*. ZEITSCHR ZELLJORSCH U MIKROSK ANAT. 1934;21(2):169-  
624 223.
- 625 21. Dobzhansky T. On the sterility of the interracial hybrids in *Drosophila pseudoobscura*. P  
626 Natl Acad Sci USA. 1933;19:397-403. doi: DOI 10.1073/pnas.19.4.397. PubMed PMID:  
627 WOS:000201970900068.
- 628 22. Hardy RW, Loughheed A, Markow TA. Reproductive tract and spermatid abnormalities of  
629 hybrid males from reciprocal crosses between *Drosophila mojavensis* and *D. arizonae*. Fly  
630 (Austin). 2011;5(2):76-80. Epub 2011/05/05. doi: 10.4161/fly.5.2.15571. PubMed PMID:  
631 21540637.
- 632 23. Coyne JA. Genetic-Basis of Male-Sterility in Hybrids between 2 Closely Related Species  
633 of *Drosophila*. P Natl Acad Sci-Biol. 1984;81(14):4444-7. doi: DOI 10.1073/pnas.81.14.4444.  
634 PubMed PMID: WOS:A1984TD00100044.
- 635 24. Masly JP, Jones CD, Noor MA, Locke J, Orr HA. Gene transposition as a cause of hybrid  
636 sterility in *Drosophila*. Science. 2006;313(5792):1448-50. Epub 2006/09/09. doi:  
637 10.1126/science.1128721. PubMed PMID: 16960009.
- 638 25. Coluzzi M, Sabatini A, della Torre A, Di Deco MA, Petrarca V. A polytene chromosome  
639 analysis of the *Anopheles gambiae* species complex. Science. 2002;298(5597):1415-8. PubMed  
640 PMID: 12364623.
- 641 26. Coetzee M, Hunt RH, Wilkerson R, Della Torre A, Coulibaly MB, Besansky NJ.  
642 *Anopheles coluzzii* and *Anopheles amharicus*, new members of the *Anopheles gambiae*

643 complex. *Zootaxa*. 2013;3619(3):246-74. doi: Doi 10.11646/Zootaxa.3619.3.2. PubMed PMID:  
644 ISI:000315436200002.

645 27. Fontaine MC, Pease JB, Steele A, Waterhouse RM, Neafsey DE, Sharakhov IV, et al.  
646 Extensive introgression in a malaria vector species complex revealed by phylogenomics.  
647 *Science*. 2015;347(6217):42-+. doi: Unsp 1258524

648 Doi 10.1126/Science.1258524. PubMed PMID: WOS:000347102300041.

649 28. Thawornwattana Y, Dalquen D, Yang Z. Coalescent Analysis of Phylogenomic Data  
650 Confidently Resolves the Species Relationships in the *Anopheles gambiae* Species Complex.  
651 *Mol Biol Evol*. 2018;35(10):2512-27. Epub 2018/08/14. doi: 10.1093/molbev/msy158. PubMed  
652 PMID: 30102363; PubMed Central PMCID: PMC6188554.

653 29. Bernardini F, Galizi R, Wunderlich M, Taxiarchi C, Kranjc N, Kyrou K, et al. Cross-  
654 Species Y Chromosome Function Between Malaria Vectors of the *Anopheles gambiae* Species  
655 Complex. *Genetics*. 2017;207(2):729-40. Epub 2017/09/02. doi: 10.1534/genetics.117.300221.  
656 PubMed PMID: 28860320; PubMed Central PMCID: PMC6188554.

657 30. Davidson G, Paterson HE, Coluzzi M, Mason GF, Micks DW. The *Anopheles gambiae*  
658 Complex. In: Wright JW, Pal R, editors. *Genetics of Insect Vectors of Disease*. Amsterdam-  
659 London-New York: Elsevier Publishing Company; 1967. p. 211-49.

660 31. Presgraves DC, Orr HA. Haldane's rule in taxa lacking a hemizygous X. *Science*.  
661 1998;282(5390):952-4. Epub 1998/10/30. PubMed PMID: 9794768.

662 32. Curtis CF. The mechanism of hybrid male sterility from crosses in the *Anopheles*  
663 *gambiae* and *Glossina morsitans* complexes. In: Steiner WM, Tabachnick WJ, Rai KS, Narang S,  
664 editors. *Recent Developments in the Genetics of Disease Vectors*. Champaign, IL: Stipes  
665 Publishing Company; 1982. p. 290-312.

- 666 33. Pombi M, Kengne P, Gimonneau G, Tene-Fossog B, Ayala D, Kamdem C, et al.  
667 Dissecting functional components of reproductive isolation among closely related sympatric  
668 species of the *Anopheles gambiae* complex. *Evol Appl*. 2017;10(10):1102-20. Epub 2017/11/21.  
669 doi: 10.1111/eva.12517. PubMed PMID: 29151864; PubMed Central PMCID:  
670 PMCPMC5680640.
- 671 34. World malaria report. Geneva, Switzerland: World Health Organization, 2018.
- 672 35. Dame DA, Curtis CF, Benedict MQ, Robinson AS, Knols BG. Historical applications of  
673 induced sterilisation in field populations of mosquitoes. *Malar J*. 2009;8 Suppl 2:S2. Epub  
674 2009/12/16. doi: 10.1186/1475-2875-8-S2-S2. PubMed PMID: 19917072; PubMed Central  
675 PMCID: PMCPMC2777324.
- 676 36. Hammond A, Galizi R, Kyrou K, Simoni A, Siniscalchi C, Katsanos D, et al. A CRISPR-  
677 Cas9 gene drive system targeting female reproduction in the malaria mosquito vector *Anopheles*  
678 *gambiae*. *Nat Biotechnol*. 2016;34(1):78-83. Epub 2015/12/08. doi: 10.1038/nbt.3439. PubMed  
679 PMID: 26641531; PubMed Central PMCID: PMCPMC4913862.
- 680 37. Macias VM, Ohm JR, Rasgon JL. Gene Drive for Mosquito Control: Where Did It Come  
681 from and Where Are We Headed? *Int J Env Res Pub He*. 2017;14(9). doi: ARTN 1006  
682 10.3390/ijerph14091006. PubMed PMID: WOS:000411574400058.
- 683 38. Kyrou K, Hammond AM, Galizi R, Kranjc N, Burt A, Beaghton AK, et al. A CRISPR-  
684 Cas9 gene drive targeting doublesex causes complete population suppression in caged *Anopheles*  
685 *gambiae* mosquitoes. *Nat Biotechnol*. 2018;36(11):1062-6. Epub 2018/09/25. doi:  
686 10.1038/nbt.4245. PubMed PMID: 30247490.
- 687 39. Gantz VM, Jasinskiene N, Tatarenkova O, Fazekas A, Macias VM, Bier E, et al. Highly  
688 efficient Cas9-mediated gene drive for population modification of the malaria vector mosquito

- 689 *Anopheles stephensi*. Proc Natl Acad Sci U S A. 2015;112(49):E6736-43. Epub 2015/11/26. doi:  
690 10.1073/pnas.1521077112. PubMed PMID: 26598698; PubMed Central PMCID:  
691 PMC4679060.
- 692 40. Hammond AM, Kyrou K, Bruttini M, North A, Galizi R, Karlsson X, et al. The creation  
693 and selection of mutations resistant to a gene drive over multiple generations in the malaria  
694 mosquito. PLoS Genet. 2017;13(10):e1007039. Epub 2017/10/05. doi:  
695 10.1371/journal.pgen.1007039. PubMed PMID: 28976972; PubMed Central PMCID:  
696 PMC5648257.
- 697 41. Diabate A, Dabire RK, Millogo N, Lehmann T. Evaluating the effect of postmating  
698 isolation between molecular forms of *Anopheles gambiae* (Diptera: Culicidae). J Med Entomol.  
699 2007;44(1):60-4. Epub 2007/02/14. PubMed PMID: 17294921.
- 700 42. Aboagye-Antwi F, Alhafez N, Weedall GD, Brothwood J, Kandola S, Paton D, et al.  
701 Experimental swap of *Anopheles gambiae*'s assortative mating preferences demonstrates key role  
702 of X-chromosome divergence island in incipient sympatric speciation. PLoS Genet.  
703 2015;11(4):e1005141. Epub 2015/04/17. doi: 10.1371/journal.pgen.1005141. PubMed PMID:  
704 25880677; PubMed Central PMCID: PMC4400153.
- 705 43. Krzywinski J, Sangare D, Besansky NJ. Satellite DNA from the Y chromosome of the  
706 malaria vector *Anopheles gambiae*. Genetics. 2005;169(1):185-96. Epub 2004/10/07. doi:  
707 genetics.104.034264 [pii]  
708 10.1534/genetics.104.034264. PubMed PMID: 15466420; PubMed Central PMCID:  
709 PMC1448884.
- 710 44. Hall AB, Papathanos PA, Sharma A, Cheng C, Akbari OS, Assour L, et al. Radical  
711 remodeling of the Y chromosome in a recent radiation of malaria mosquitoes. Proc Natl Acad



- 712 Sci U S A. 2016;113(15):E2114-23. doi: 10.1073/pnas.1525164113. PubMed PMID: 27035980;  
713 PubMed Central PMCID: PMC4839409.
- 714 45. Krzywinska E, Krzywinski J. Analysis of expression in the *Anopheles gambiae*  
715 developing testes reveals rapidly evolving lineage-specific genes in mosquitoes. BMC  
716 Genomics. 2009;10:300. Epub 2009/07/08. doi: 10.1186/1471-2164-10-300. PubMed PMID:  
717 19580678; PubMed Central PMCID: PMC2713267.
- 718 46. Balabanidou V, Kampouraki A, MacLean M, Blomquist GJ, Tittiger C, Juarez MP, et al.  
719 Cytochrome P450 associated with insecticide resistance catalyzes cuticular hydrocarbon  
720 production in *Anopheles gambiae*. Proc Natl Acad Sci U S A. 2016;113(33):9268-73. Epub  
721 2016/07/22. doi: 10.1073/pnas.1608295113. PubMed PMID: 27439866; PubMed Central  
722 PMCID: PMC4995928.
- 723 47. Catteruccia F, Crisanti A, Wimmer EA. Transgenic technologies to induce sterility.  
724 Malar J. 2009;8 Suppl 2:S7. Epub 2009/12/16. doi: 10.1186/1475-2875-8-S2-S7. PubMed  
725 PMID: 19917077; PubMed Central PMCID: PMC4995928.
- 726 48. Kempfues KJ, Kaufman TC, Raff RA, Raff EC. The testis-specific beta-tubulin subunit  
727 in *Drosophila melanogaster* has multiple functions in spermatogenesis. Cell. 1982;31(3 Pt  
728 2):655-70. Epub 1982/12/01. PubMed PMID: 6819086.
- 729 49. Papathanos PA, Windbichler N, Menichelli M, Burt A, Crisanti A. The vasa regulatory  
730 region mediates germline expression and maternal transmission of proteins in the malaria  
731 mosquito *Anopheles gambiae*: a versatile tool for genetic control strategies. BMC Mol Biol.  
732 2009;10:65. Epub 2009/07/04. doi: 10.1186/1471-2199-10-65. PubMed PMID: 19573226;  
733 PubMed Central PMCID: PMC2713240.

- 734 50. Good JM, Handel MA, Nachman MW. Asymmetry and polymorphism of hybrid male  
735 sterility during the early stages of speciation in house mice. *Evolution*. 2008;62(1):50-65. Epub  
736 2007/11/17. doi: 10.1111/j.1558-5646.2007.00257.x. PubMed PMID: 18005156; PubMed  
737 Central PMCID: PMCPMC2907743.
- 738 51. Fontoura NG, Araki AS, Azevedo RV, Galardo AKR, Peixoto AA, Lima JBP. Hybrid  
739 sterility in crosses between two Brazilian sibling species of the *Anopheles albitarsis* complex.  
740 *Parasite Vector*. 2014;7. doi: ARTN 559  
741 10.1186/s13071-014-0559-6. PubMed PMID: WOS:000348945100001.
- 742 52. Suwannamit S, Baimai V, Otsuka Y, Saeung A, Thongsahuan S, Tuetun B, et al.  
743 Cytogenetic and molecular evidence for an additional new species within the taxon *Anopheles*  
744 *barbirostris* (Diptera: Culicidae) in Thailand. *Parasitol Res*. 2009;104(4):905-18. Epub  
745 2008/12/02. doi: 10.1007/s00436-008-1272-1. PubMed PMID: 19043741.
- 746 53. McKee BD, Yan R, Tsai JH. Meiosis in male *Drosophila*. *Spermatogenesis*.  
747 2012;2(3):167-84. Epub 2012/10/23. doi: 10.4161/spmg.21800. PubMed PMID: 23087836;  
748 PubMed Central PMCID: PMCPMC3469440.
- 749 54. Bonaccorsi S, Gatti M. *Drosophila* Male Meiosis. *Methods Mol Biol*. 2017;1471:277-88.  
750 Epub 2017/03/30. doi: 10.1007/978-1-4939-6340-9\_16. PubMed PMID: 28349403.
- 751 55. Hawley RS. Meiosis: How male flies do meiosis. *Current Biology*. 2002;12(19):R660-  
752 R2. doi: Doi 10.1016/S0960-9822(02)01161-2. PubMed PMID: WOS:000178404100010.
- 753 56. Chang CH, Larracuente AM. Heterochromatin-Enriched Assemblies Reveal the  
754 Sequence and Organization of the *Drosophila melanogaster* Y Chromosome. *Genetics*. 2018.  
755 Epub 2018/11/14. doi: 10.1534/genetics.118.301765. PubMed PMID: 30420487.

- 756 57. Ishishita S, Tsuboi K, Ohishi N, Tsuchiya K, Matsuda Y. Abnormal pairing of X and Y  
757 sex chromosomes during meiosis I in interspecific hybrids of *Phodopus campbelli* and *P.*  
758 *sungorus*. *Sci Rep*. 2015;5:9435. Epub 2015/03/25. doi: 10.1038/srep09435. PubMed PMID:  
759 25801302; PubMed Central PMCID: PMC4371188.
- 760 58. Bikchurina TI, Tishakova KV, Kizilova EA, Romanenko SA, Serdyukova NA,  
761 Torgasheva AA, et al. Chromosome Synapsis and Recombination in Male-Sterile and Female-  
762 Fertile Interspecies Hybrids of the Dwarf Hamsters (*Phodopus*, Cricetidae). *Genes (Basel)*.  
763 2018;9(5). Epub 2018/04/26. doi: 10.3390/genes9050227. PubMed PMID: 29693587; PubMed  
764 Central PMCID: PMC5977167.
- 765 59. Belonogova NM, Polyakov AV, Karamysheva TV, Torgasheva AA, Searle JB, Borodin  
766 PM. Chromosome Synapsis and Recombination in Male Hybrids between Two Chromosome  
767 Races of the Common Shrew (*Sorex araneus* L., Soricidae, Eulipotyphla). *Genes (Basel)*.  
768 2017;8(10). Epub 2017/10/21. doi: 10.3390/genes8100282. PubMed PMID: 29053571; PubMed  
769 Central PMCID: PMC5664132.
- 770 60. Miyazaki S, Kim J, Sakuno T, Watanabe Y. Hierarchical Regulation of Centromeric  
771 Cohesion Protection by Meikin and Shugoshin during Meiosis I. *Cold Spring Harb Symp Quant*  
772 *Biol*. 2017;82:259-66. Epub 2017/12/03. doi: 10.1101/sqb.2017.82.033811. PubMed PMID:  
773 29196561.
- 774 61. Bolcun-Filas E, Schimenti JC. Genetics of meiosis and recombination in mice. *Int Rev*  
775 *Cell Mol Biol*. 2012;298:179-227. Epub 2012/08/11. doi: 10.1016/B978-0-12-394309-5.00005-  
776 5. PubMed PMID: 22878107.

- 777 62. Bomblies K, Higgins JD, Yant L. Meiosis evolves: adaptation to external and internal  
778 environments. *New Phytol.* 2015;208(2):306-23. Epub 2015/06/16. doi: 10.1111/nph.13499.  
779 PubMed PMID: 26075313.
- 780 63. Hayashi K, Yoshida K, Matsui Y. A histone H3 methyltransferase controls epigenetic  
781 events required for meiotic prophase. *Nature.* 2005;438(7066):374-8. Epub 2005/11/18. doi:  
782 10.1038/nature04112. PubMed PMID: 16292313.
- 783 64. Gutierrez-Caballero C, Cebollero LR, Pendas AM. Shugoshins: from protectors of  
784 cohesion to versatile adaptors at the centromere. *Trends Genet.* 2012;28(7):351-60. Epub  
785 2012/05/01. doi: 10.1016/j.tig.2012.03.003. PubMed PMID: 22542109.
- 786 65. Pinto BS, Orr-Weaver TL. *Drosophila* protein phosphatases 2A B' Wdb and Wrd regulate  
787 meiotic centromere localization and function of the MEI-S332 Shugoshin. *Proc Natl Acad Sci U*  
788 *S A.* 2017;114(49):12988-93. Epub 2017/11/22. doi: 10.1073/pnas.1718450114. PubMed PMID:  
789 29158400; PubMed Central PMCID: PMC5724294.
- 790 66. Kitajima TS, Ohsugi M, Ellenberg J. Complete kinetochore tracking reveals error-prone  
791 homologous chromosome biorientation in mammalian oocytes. *Cell.* 2011;146(4):568-81. Epub  
792 2011/08/23. doi: 10.1016/j.cell.2011.07.031. PubMed PMID: 21854982.
- 793 67. Jones KT, Lane SI. Molecular causes of aneuploidy in mammalian eggs. *Development.*  
794 2013;140(18):3719-30. Epub 2013/08/29. doi: 10.1242/dev.090589. PubMed PMID: 23981655.
- 795 68. Saka Y, Giuraniuc CV, Ohkura H. Accurate chromosome segregation by probabilistic  
796 self-organisation. *Bmc Biol.* 2015;13:65. Epub 2015/08/13. doi: 10.1186/s12915-015-0172-y.  
797 PubMed PMID: 26264961; PubMed Central PMCID: PMC4533937.
- 798 69. Blum JA, Bonaccorsi S, Marzullo M, Palumbo V, Yamashita YM, Barbash DA, et al.  
799 The Hybrid Incompatibility Genes Lhr and Hmr Are Required for Sister Chromatid Detachment

- 800 During Anaphase but Not for Centromere Function. *Genetics*. 2017;207(4):1457-72. Epub  
801 2017/10/20. doi: 10.1534/genetics.117.300390. PubMed PMID: 29046402; PubMed Central  
802 PMCID: PMC5714459.
- 803 70. Zhu W, Hu B, Becker C, Dogan ES, Berendzen KW, Weigel D, et al. Altered chromatin  
804 compaction and histone methylation drive non-additive gene expression in an interspecific  
805 Arabidopsis hybrid. *Genome Biol*. 2017;18(1):157. Epub 2017/08/24. doi: 10.1186/s13059-017-  
806 1281-4. PubMed PMID: 28830561; PubMed Central PMCID: PMC5568265.
- 807 71. Francisco FO, Lemos B. How do y-chromosomes modulate genome-wide epigenetic  
808 States: genome folding, chromatin sinks, and gene expression. *J Genomics*. 2014;2:94-103. Epub  
809 2014/07/25. doi: 10.7150/jgen.8043. PubMed PMID: 25057325; PubMed Central PMCID:  
810 PMC54105431.
- 811 72. Hartl TA, Sweeney SJ, Knepler PJ, Bosco G. Condensin II resolves chromosomal  
812 associations to enable anaphase I segregation in *Drosophila* male meiosis. *PLoS Genet*.  
813 2008;4(10):e1000228. doi: 10.1371/journal.pgen.1000228. PubMed PMID: 18927632; PubMed  
814 Central PMCID: PMC2562520.
- 815 73. Dion-Cote AM, Barbash DA. Beyond speciation genes: an overview of genome stability  
816 in evolution and speciation. *Curr Opin Genet Dev*. 2017;47:17-23. Epub 2017/08/23. doi:  
817 10.1016/j.gde.2017.07.014. PubMed PMID: 28830007; PubMed Central PMCID:  
818 PMC5716907.
- 819 74. Romero-Soriano V, Modolo L, Lopez-Maestre H, Mugat B, Pessia E, Chambeyron S, et  
820 al. Transposable Element Misregulation Is Linked to the Divergence between Parental piRNA  
821 Pathways in *Drosophila* Hybrids. *Genome Biol Evol*. 2017;9(6):1450-70. Epub 2017/09/01. doi:  
822 10.1093/gbe/evx091. PubMed PMID: 28854624; PubMed Central PMCID: PMC5499732.

- 823 75. George P, Jensen S, Pogorelcnik R, Lee J, Xing Y, Brasslet E, et al. Increased production  
824 of piRNAs from euchromatic clusters and genes in *Anopheles gambiae* compared with  
825 *Drosophila melanogaster*. *Epigenetics Chromatin*. 2015;8:50. doi: 10.1186/s13072-015-0041-5.  
826 PubMed PMID: 26617674; PubMed Central PMCID: PMC4662822.
- 827 76. Ferree PM, Barbash DA. Species-specific heterochromatin prevents mitotic chromosome  
828 segregation to cause hybrid lethality in *Drosophila*. *PLoS Biol*. 2009;7(10):e1000234. Epub  
829 2009/10/28. doi: 10.1371/journal.pbio.1000234. PubMed PMID: 19859525; PubMed Central  
830 PMCID: PMCPMC2760206.
- 831 77. Bayes JJ, Malik HS. Altered heterochromatin binding by a hybrid sterility protein in  
832 *Drosophila* sibling species. *Science*. 2009;326(5959):1538-41. Epub 2009/11/26. doi:  
833 10.1126/science.1181756. PubMed PMID: 19933102; PubMed Central PMCID:  
834 PMCPMC2987944.
- 835 78. Henikoff S, Ahmad K, Malik HS. The centromere paradox: Stable inheritance with  
836 rapidly evolving DNA. *Science*. 2001;293(5532):1098-102. doi: DOI 10.1126/science.1062939.  
837 PubMed PMID: WOS:000170432600049.
- 838 79. Malik HS, Henikoff S. Adaptive evolution of *cid*, a centromere-specific histone in  
839 *drosophila*. *Genetics*. 2001;157(3):1293-8. PubMed PMID: WOS:000167420000032.
- 840 80. Rosin L, Mellone BG. Co-evolving CENP-A and CAL1 Domains Mediate Centromeric  
841 CENP-A Deposition across *Drosophila* Species. *Developmental Cell*. 2016;37(2):136-47. doi:  
842 10.1016/j.devcel.2016.03.021. PubMed PMID: WOS:000374712900008.
- 843 81. Darwin C. On the origin of species by means of natural selection or, The Preservation of  
844 favoured races in the struggle for life. London: Electric Book Co.,; 2001.

- 845 82. Scott JA, Brogdon WG, Collins FH. Identification of single specimens of the *Anopheles*  
846 *gambiae* complex by the polymerase chain reaction. *Am J Trop Med Hyg.* 1993;49(4):520-9.  
847 Epub 1993/10/01. PubMed PMID: 8214283.
- 848 83. Fanello C, Santolamazza F, della Torre A. Simultaneous identification of species and  
849 molecular forms of the *Anopheles gambiae* complex by PCR-RFLP. *Med Vet Entomol.*  
850 2002;16(4):461-4. Epub 2003/01/04. PubMed PMID: 12510902.
- 851 84. Benedict M, Dotson EM. *Methods in Anopheles Research*:  
852 [https://www.beiresources.org/Portals/2/VectorResources/2016%20Methods%20in%20Anophele](https://www.beiresources.org/Portals/2/VectorResources/2016%20Methods%20in%20Anopheles%20Research%20full%20manual.pdf)  
853 [s%20Research%20full%20manual.pdf](https://www.beiresources.org/Portals/2/VectorResources/2016%20Methods%20in%20Anopheles%20Research%20full%20manual.pdf); 2015.
- 854 85. Pitts RJ, Liu C, Zhou X, Malpartida JC, Zwiebel LJ. Odorant receptor-mediated sperm  
855 activation in disease vector mosquitoes. *Proc Natl Acad Sci U S A.* 2014;111(7):2566-71. doi:  
856 10.1073/pnas.1322923111. PubMed PMID: 24550284; PubMed Central PMCID: PMC3932880.
- 857 86. Timoshevskiy VA, Sharma A, Sharakhov IV, Sharakhova MV. Fluorescent in situ  
858 Hybridization on Mitotic Chromosomes of Mosquitoes. *J Vis Exp.* 2012;(67). Epub 2012/09/26.  
859 doi: 10.3791/4215. PubMed PMID: 23007640.
- 860 87. Sharakhova MV, George P, Timoshevskiy V, Sharma A, Peery A, Sharakhov IV.  
861 Mosquitoes (Diptera). In: Sharakhov IV, editor. *Protocols for Cytogenetic Mapping of Arthropod*  
862 *Genomes*. Boca Raton, FL: CRC Press, Taylor & Francis Group; 2015. p. 93-170.

863

864

## 865 **Figure Legends**

866 **Fig 1. Morphology and cell content of testes from 2-day-old adult males.** (A) Whole testis,  
867 squashed testis, and mature spermatozoa in crushed testis from *An. coluzzii* MOPTI. (B) Normal-

868 like whole testis, squashed testis, and immature spermatozoa and spermatids in crushed testis  
869 from an F1 hybrid of the cross ♀*An. merus* × ♂*An. coluzzii* MOPTI. (C) Underdeveloped whole  
870 testis, squashed testis, and undifferentiated cells in crushed testis from an F1 hybrid of the cross  
871 ♀*An. coluzzii* MOPTI × ♂*An. merus*. Vertical scale bars – 50 and 20 µm.

872

873 **Fig 2. Chromosome behavior during meiosis in testes of *An. gambiae*.** X chromosomes are  
874 labeled with 18S rDNA (red), and Y chromosomes are labeled with retrotransposon *zanzibar*  
875 (green). Chromosomes are counterstained with DAPI (blue). Scale bar – 5 µm.

876

877 **Fig 3. Chromosome behavior during meiosis in testes of interspecies hybrids.** (A) ♀*An.*  
878 *merus* × ♂*An. coluzzii* MALI. (B) ♀*An. merus* × ♂*An. coluzzii* MOPTI. (C) ♀*An. merus* × ♂*An.*  
879 *gambiae* ZANU. X chromosomes are labeled with 18S rDNA (red), and Y chromosomes are  
880 labeled with retrotransposon *zanzibar* (green). Chromosomes are counterstained with DAPI  
881 (blue). Scale bar – 5 µm.

882

883 **Fig 4. Chromosomal and molecular abnormalities in interspecies hybrids.** (A) Left panel:  
884 Lengths of metaphase chromosomes in *An. gambiae* ZANU males (filled boxplots) and in F1  
885 hybrid males from the cross ♀*An. merus* × ♂*An. gambiae* ZANU (open boxplots). Right panel:  
886 Ratios of the lengths of chromosomes between F1 hybrids and *An. gambiae* ZANU. X and Y –  
887 sex chromosomes. 2 and 3 – autosomes. Statistical significance was assessed with a two-sample  
888 pooled *t*-test. (B) Confocal images of primary spermatocytes with FISH to demonstrate pairing  
889 and unpairing of X (red) and Y (green) chromosomes in *An. coluzzii* MOPTI males and F1  
890 hybrid males from the ♀*An. merus* × ♂*An. coluzzii* MOPTI cross. (C) Percentage of the X and Y



891 chromosome pairing in primary spermatocytes of six *An. coluzzii* MOPTI males and six F1  
892 hybrid males from the ♀*An. merus* × ♂*An. coluzzii* MOPTI cross. Statistical significance was  
893 assessed with a two-sample pooled *t*-test. (D) Expression of meiotic (*Ams*, *mts*, *Dzip11*,  $\beta$ 2-  
894 *tubulin*) and pre-meiotic (*vasa*) germline-specific genes in testes of *An. coluzzii*, F1 hybrids of  
895 ♀*An. merus* × ♂*An. coluzzii* MOPTI (F1M×C), and F1 hybrids of ♀*An. coluzzii* MOPTI × ♂*An.*  
896 *merus* (F1C×M) analyzed by RT-PCR. *AgS7* – an endogenous control gene. R – reproductive  
897 tissues, B – rest of mosquito body.

898

899 **Fig 5. Genomic rearrangements of meiotic chromosomes in testes of interspecies hybrids.**

900 (A) A translocation of the fragment of the *An. merus* X chromosome to the *An. coluzzii* autosome  
901 2 in a hybrid from the ♀*An. merus* × ♂*An. coluzzii* MALI cross. The red arrow points to the  
902 translocated X-chromosome ribosomal locus labelled by 18S rDNA (red). (B) A duplication of  
903 the segment involving the rDNA locus within the *An. merus* X chromosome in a hybrid from the  
904 cross ♀*An. merus* × ♂*An. gambiae* ZANU. The red arrow indicates the new positions of the  
905 segment with the ribosomal locus labelled by 18S rDNA (red). Chromosomes are counterstained  
906 with DAPI.

907

908 **Fig 6. Schematic representation of testis development in pure species and reciprocal F1**  
909 **hybrids of the *An. gambiae* complex.**

910

911 **Fig 7. Scheme of male meiosis in pure species and interspecies hybrids of the *An. gambiae***  
912 **complex. Unlike pure species, X and Y chromosomes in meiotic prophase I of hybrids are**

913 largely unpaired. Instead of a reductional division, primary spermatocytes in interspecies hybrids  
914 undergo an equational mitotic division leading to diploid nonmotile sperms.

915

## 916 **Supporting Information**

### 917 **S1 Fig. Chromosome behavior during meiosis in testes of *An. coluzzii* MOPTI. X**

918 chromosomes are labeled with 18S rDNA (red), and Y chromosomes are labeled with  
919 retrotransposon *zanzibar* (green). Chromosomes are counterstained with DAPI (blue). Scale bar  
920 – 5  $\mu$ m.

921

### 922 **S2 Fig. Chromosome behavior during meiosis in testes of *An. merus* MAF. Sex**

923 chromosomes are labeled with 18S rDNA (red) and satellite AgY53B (green). Chromosomes are  
924 counterstained with DAPI (blue). Scale bar – 5  $\mu$ m.

925

### 926 **S3 Fig. Sizes and sex chromosome content of spermatids in pure species and interspecies**

927 **hybrids.** (A) Spermatids from a 2-day-old adult of *An. coluzzii* MOPTI. (B) Spermatids from a  
928 5-day-old adult F1 hybrid from the cross ♀*An. merus* × ♂*An. coluzzii* MOPTI. The X and Y  
929 chromosomes are visualized with 18S rDNA (red) and retrotransposon *zanzibar* (green),  
930 respectively. Chromatin is counterstained with DAPI (blue). The insets show magnified images  
931 of spermatids.

932

### 933 **S4 Fig. Visualization of sex chromosomes in a degenerate testis of a hybrid adult from the**

934 **cross ♀*An. coluzzii* MOPTI × ♂*An. merus*.** (A) DAPI-stained male accessory glands and an  
935 underdeveloped testis of a one-day-old hybrid adult. (B) Whole-mount FISH of the degenerate

936 testis with 18S rDNA (red) and satellite AgY53B (green) detects the interphase X and Y  
937 chromosomes, respectively. Chromatin is counterstained with DAPI (blue).

938

939 **S5 Fig. Increased lengths of chromosomes in testes of interspecies F1 hybrids.** Left panel:  
940 Lengths of metaphase chromosomes in *An. coluzzii* MOPTI (filled boxplots) and in F1 hybrid  
941 males from the cross *An. merus* × ♂*An. coluzzii* MOPTI (open boxplots). Right panel: Ratios of  
942 the lengths of chromosomes between hybrids and pure species. X and Y – sex chromosomes. 2  
943 and 3 – autosomes. Statistical significance was assessed with a two-sample pooled *t*-test.

944

945 **S6 Fig. Delays in the X chromosome segregation during anaphase in primary**  
946 **spermatocytes of F1 hybrid males from the cross *An. merus* × ♂*An. gambiae* ZANU.**

947

948 **S7 Fig. Visualization of sex chromosomes in testes of a pure species and interspecies F1**  
949 **hybrid.** (A, B) Testis of a one-day-old adult of *An. coluzzii* MOPTI. (C, D) Testis of a one-day-  
950 old adult F1 hybrid of the cross ♀*An. merus* × ♂*An. coluzzii* MOPTI. Whole-mount FISH with  
951 18S rDNA (red) and satellite AgY53B (green) is performed to detect the X and Y chromosomes,  
952 respectively. Chromatin is counterstained with DAPI (blue).

953

954 **S1 Table. Sizes of metaphase chromosomes in pure species and interspecies F1 hybrids of**  
955 **the *An. gambiae* complex.**

956

957 **S2 Table. Numbers and percentages of primary spermatocytes with paired and unpaired**  
958 **sex chromosomes.**

959

960 **S1 Movie. Sperm motility in a crushed testis from a 2-day-old adult of *An. merus*.**

961

962 **S2 Movie. Sperm motility in a crushed normal-like testis from a 2-day-old adult hybrid of**

963 **the cross ♀*An. merus* × ♂*An. coluzzii* MOPTI.**

964

965

966

967

968

Whole testis

Squashed testis

Crushed testis

**A***An. coluzzii* MOPTI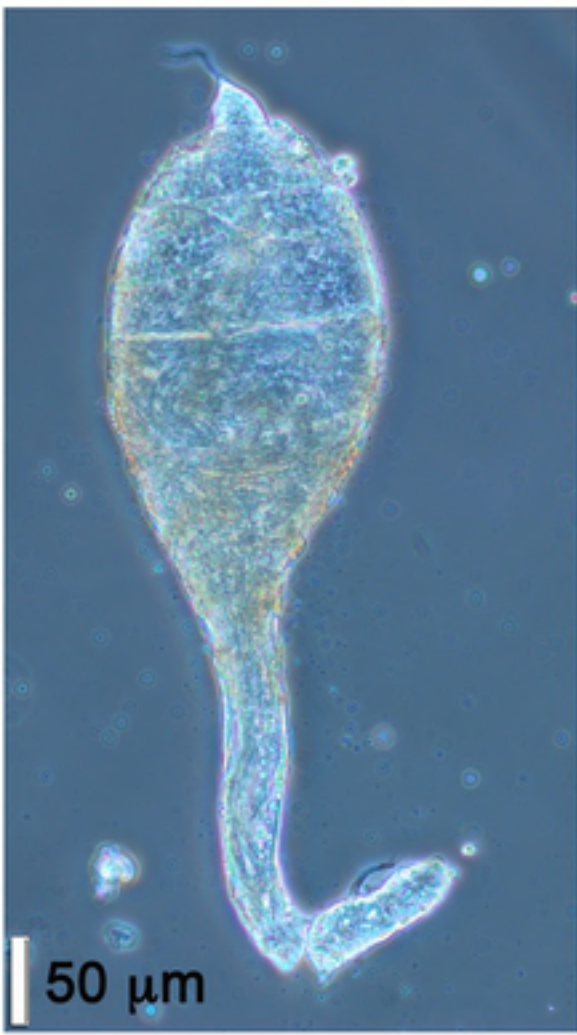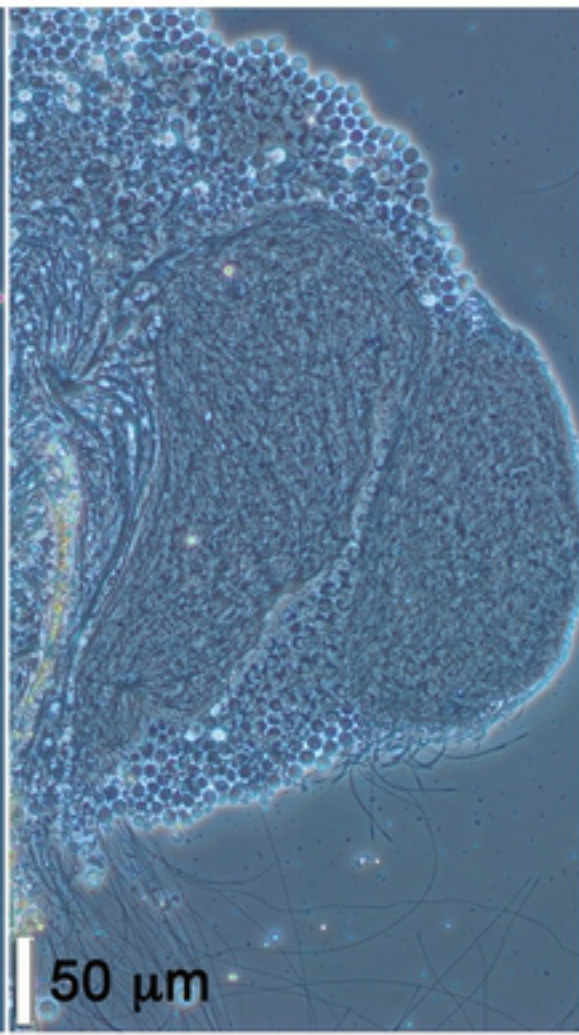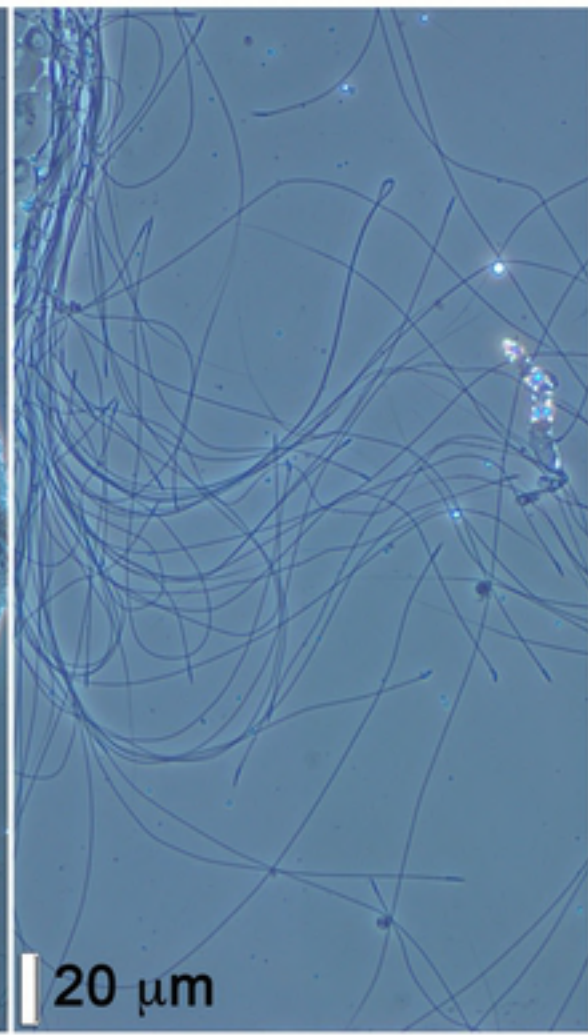**B**♀ *An. merus* x ♂ *An. coluzzii* MOPTI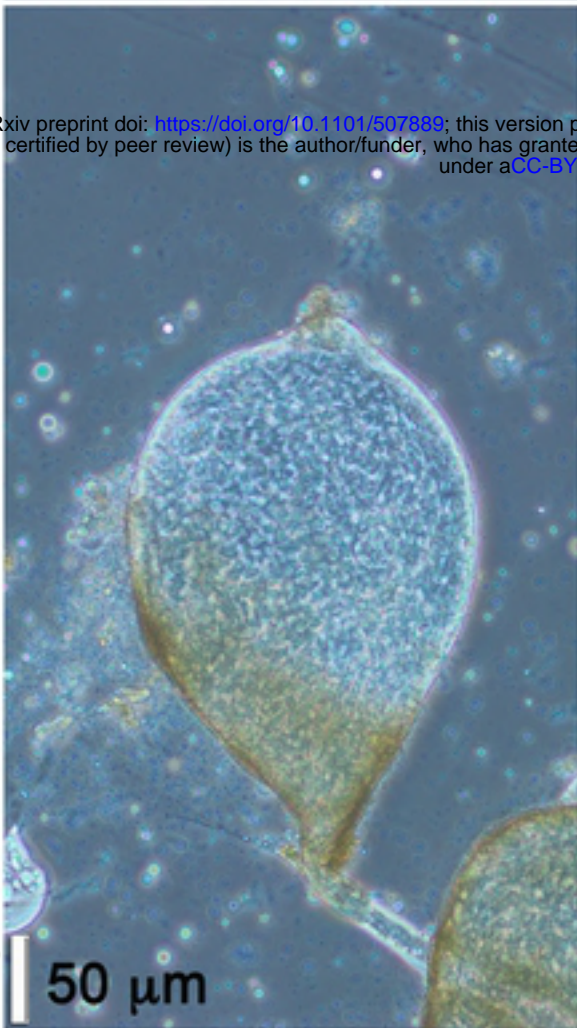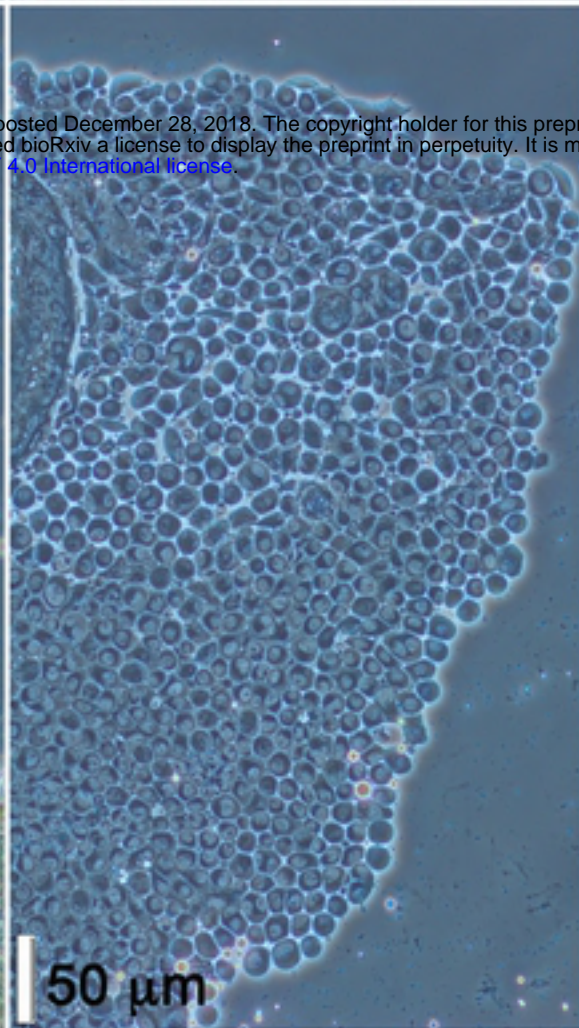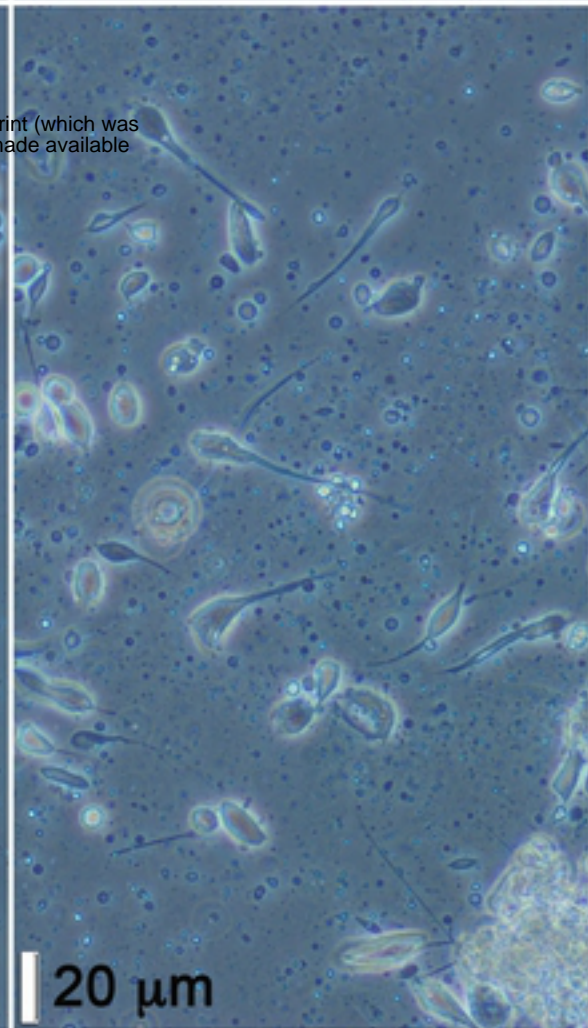**C**♀ *An. coluzzii* MOPTI x ♂ *An. merus*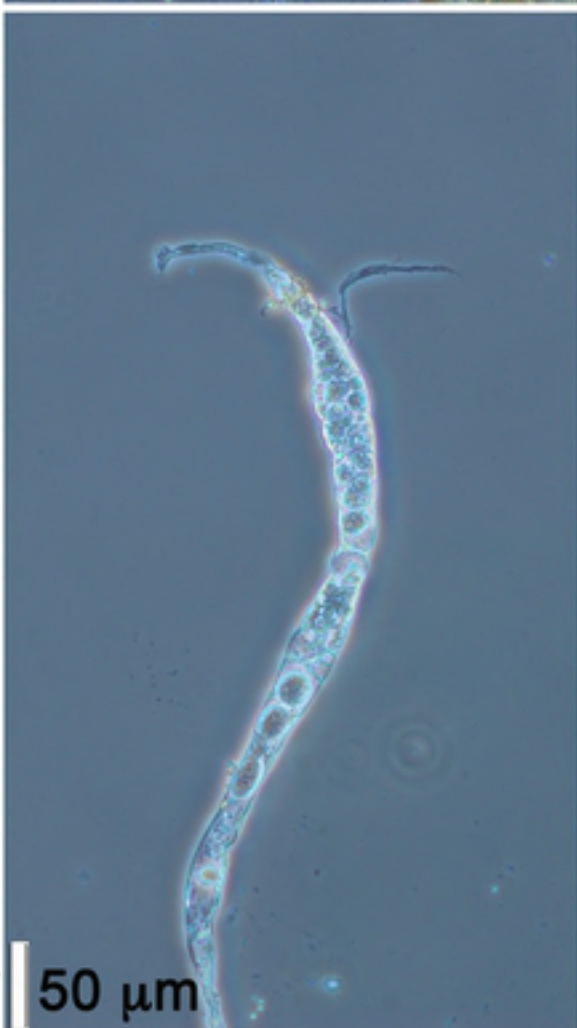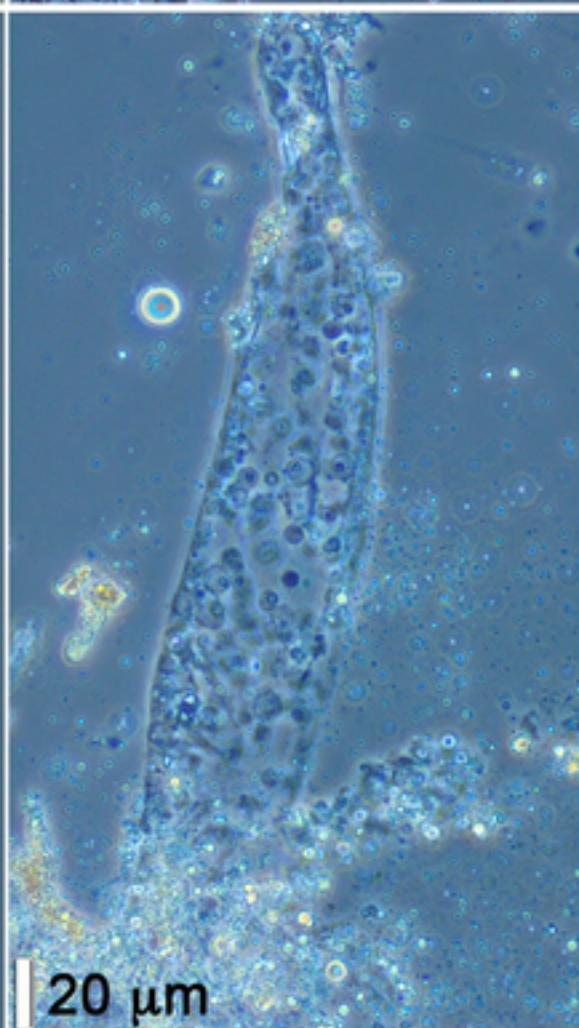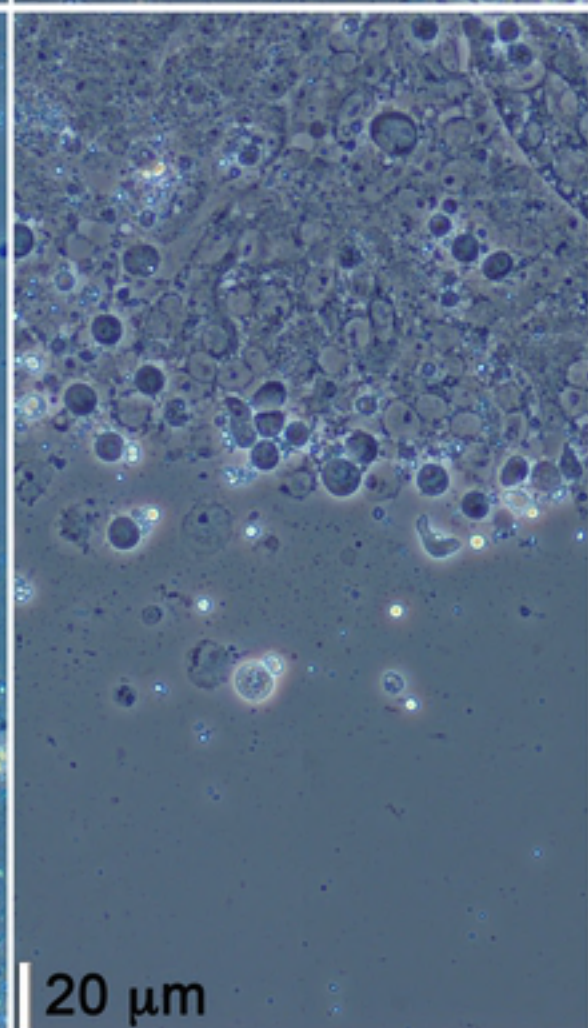

Figure 1

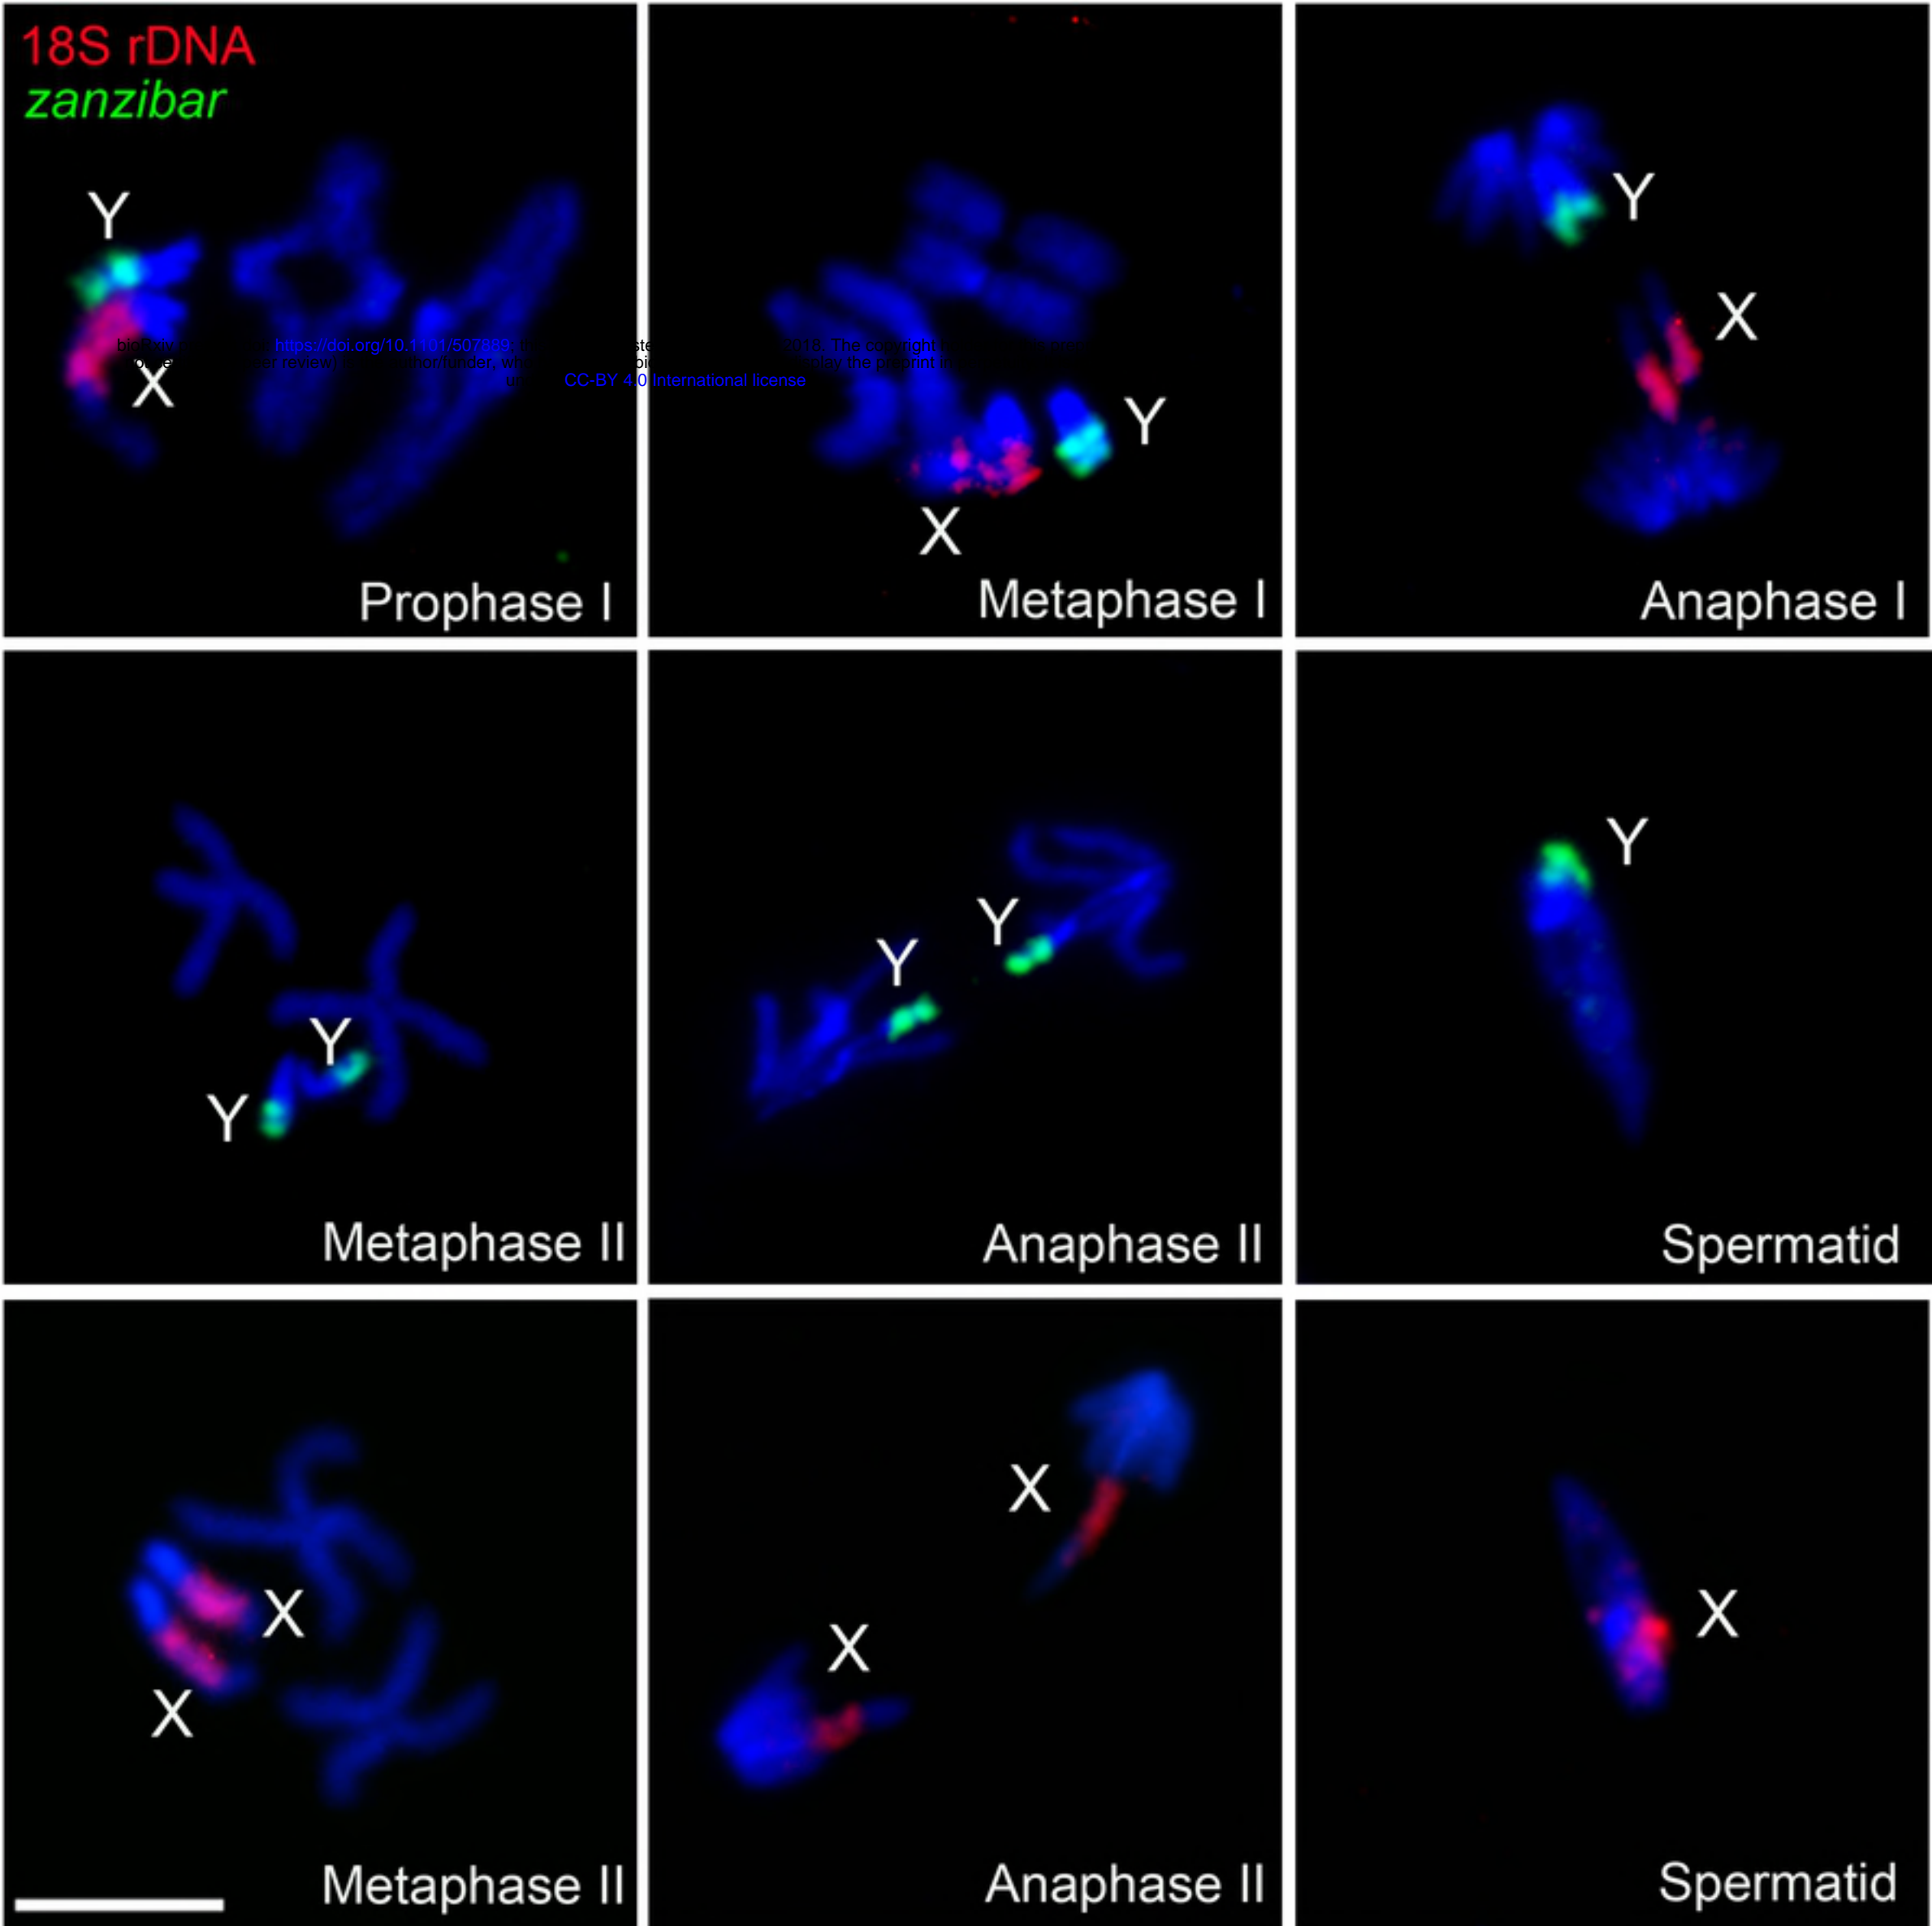

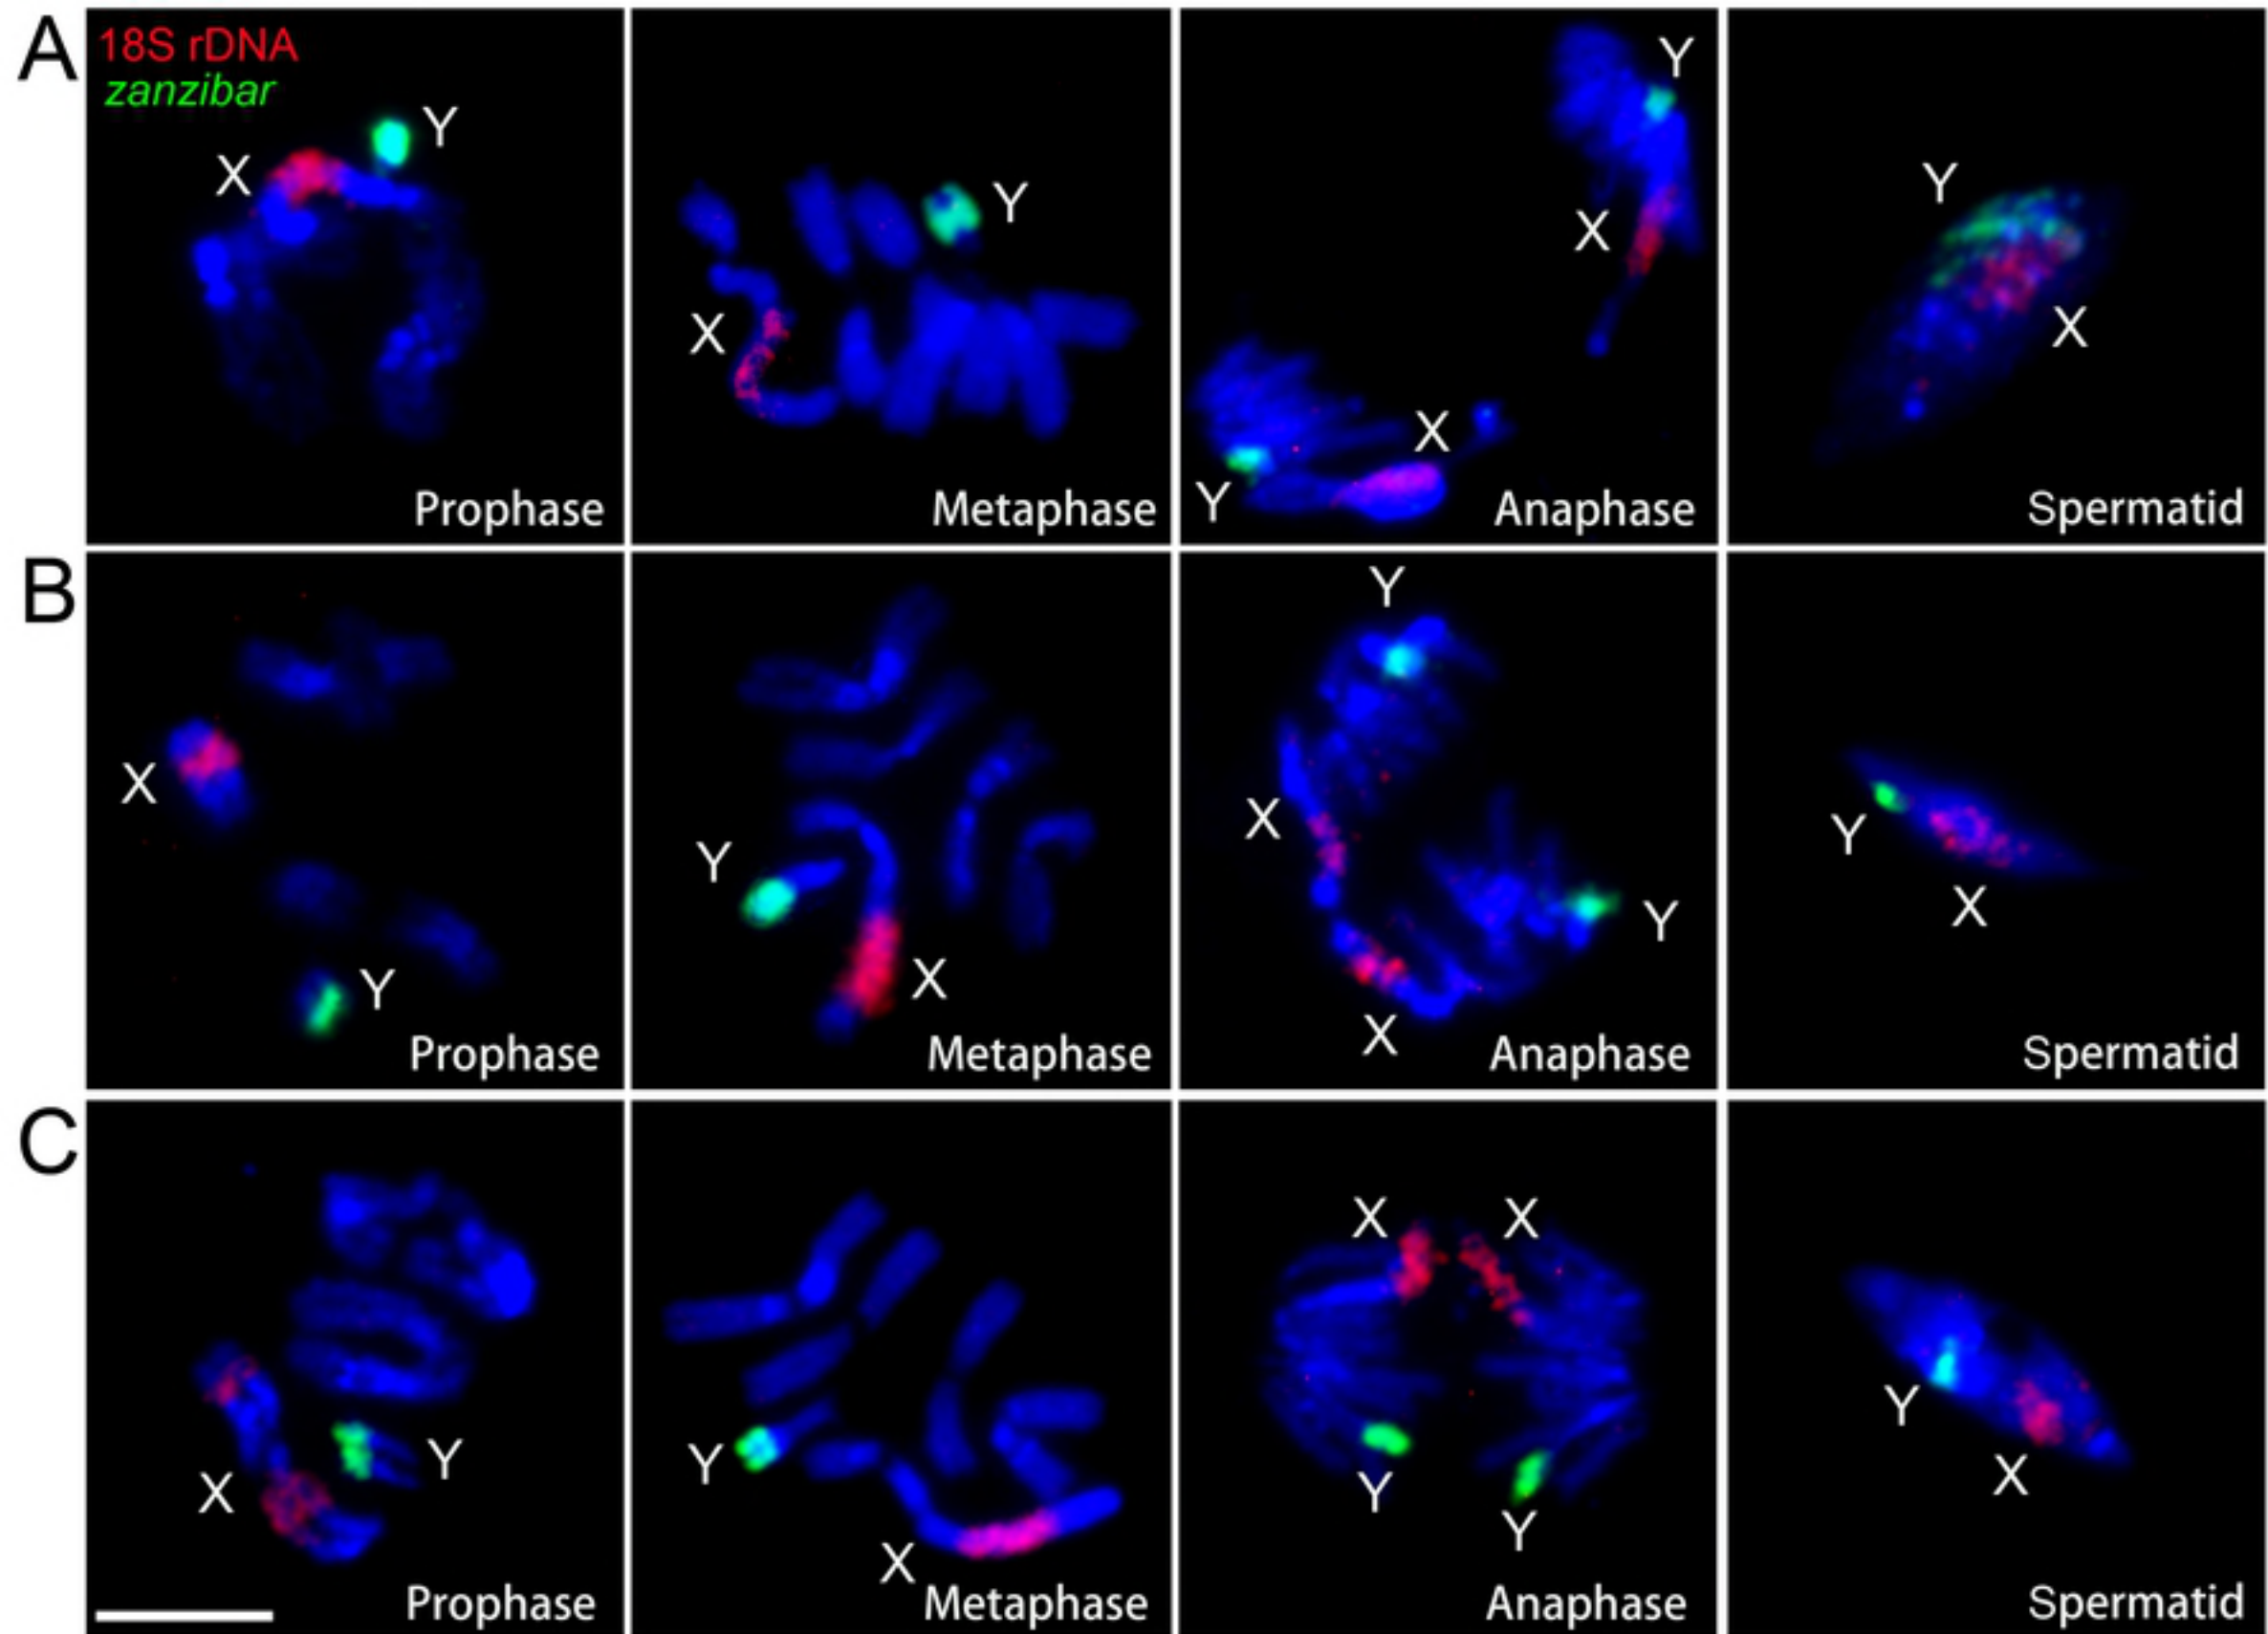

Figure 3

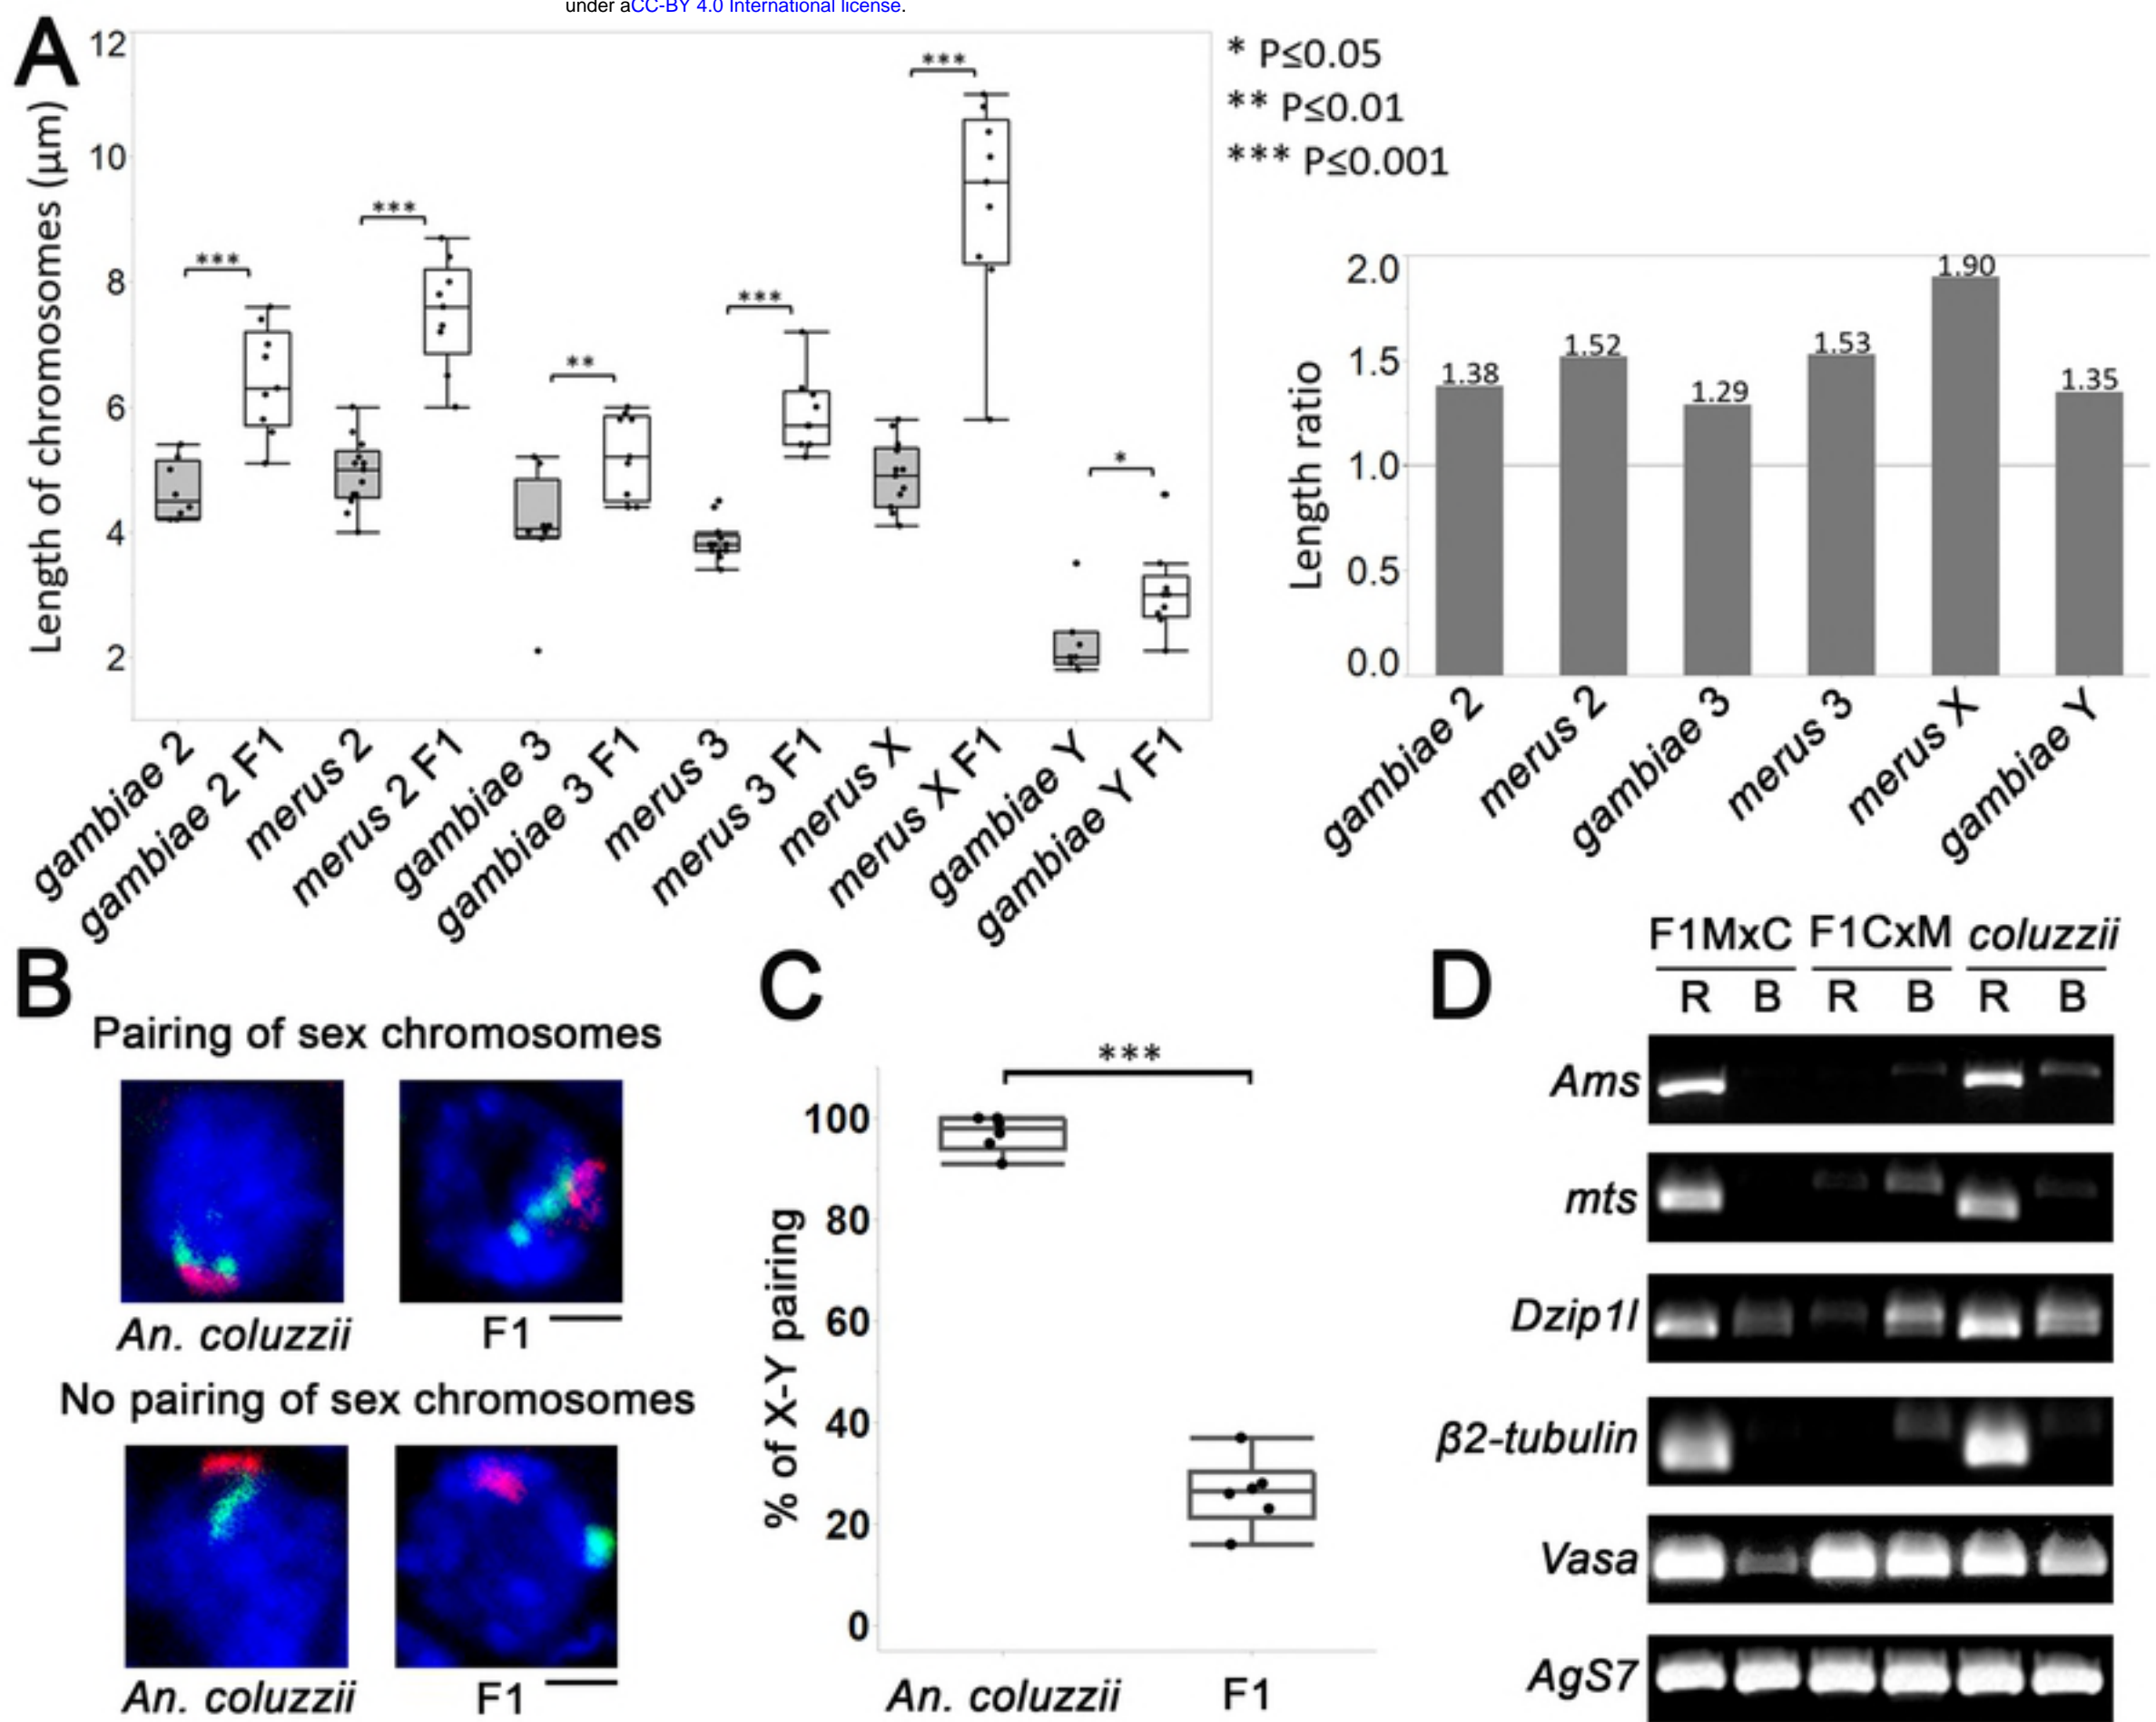

Figure 4



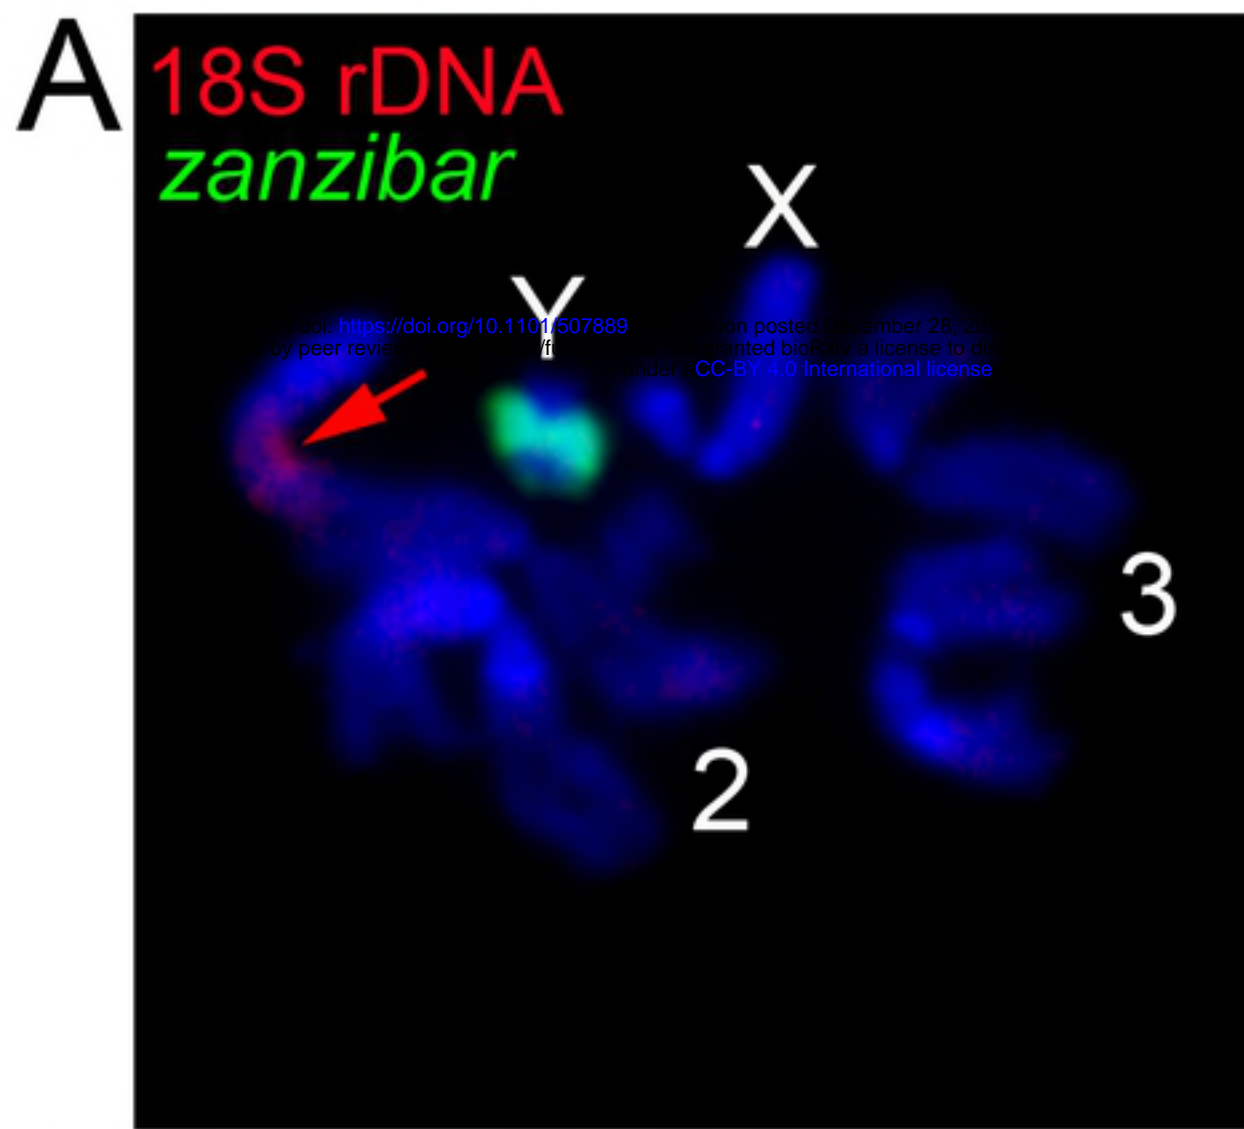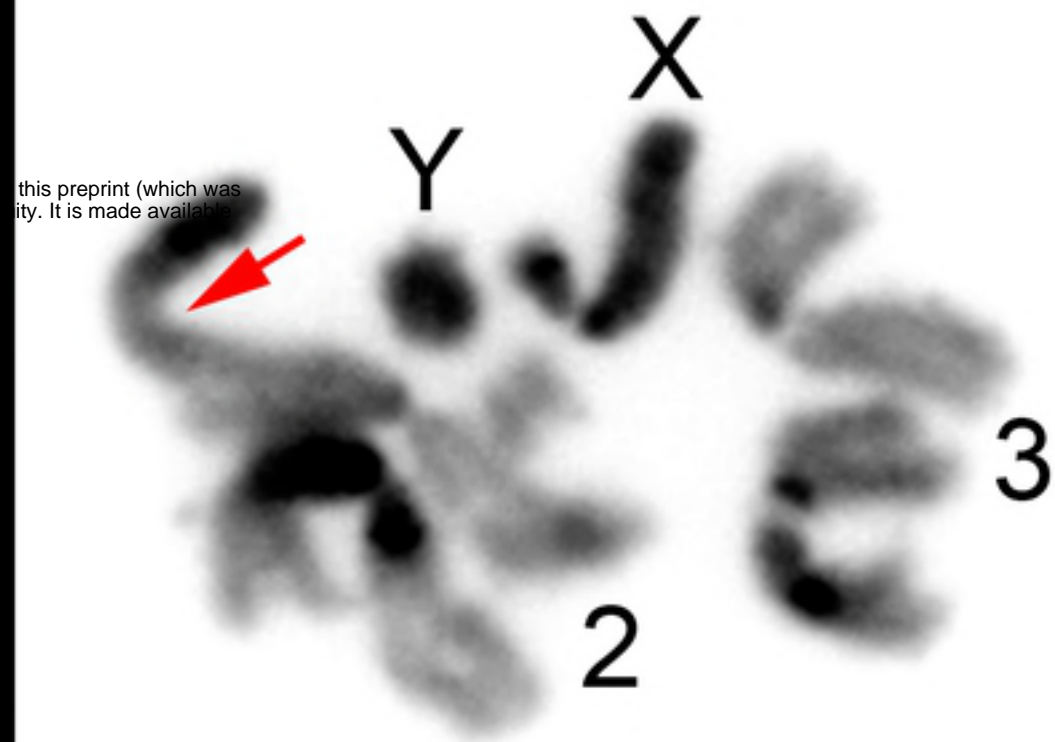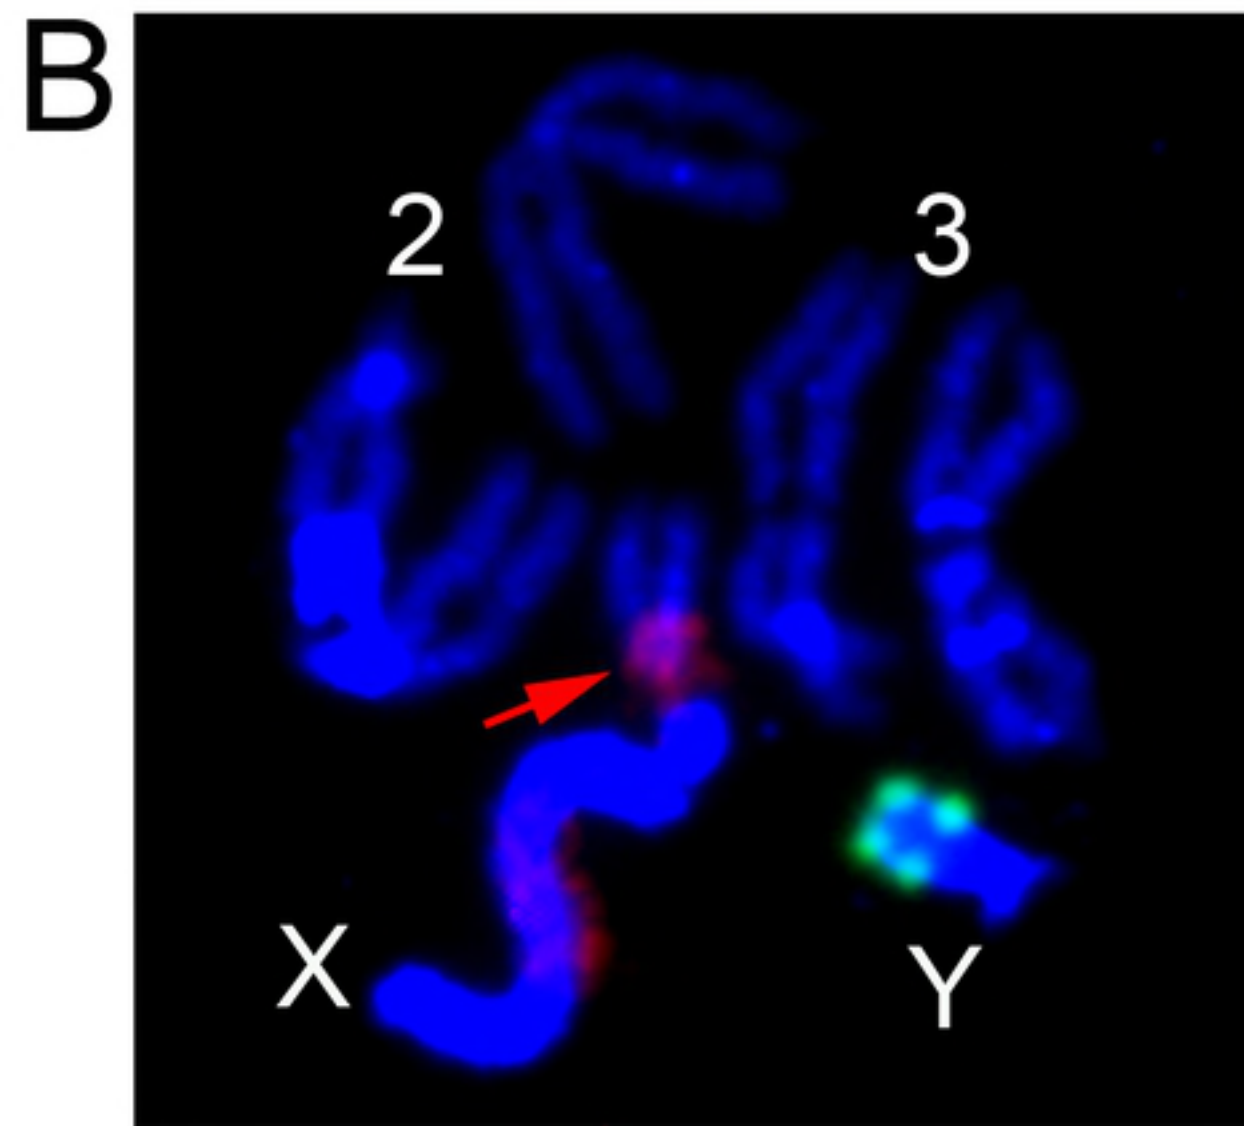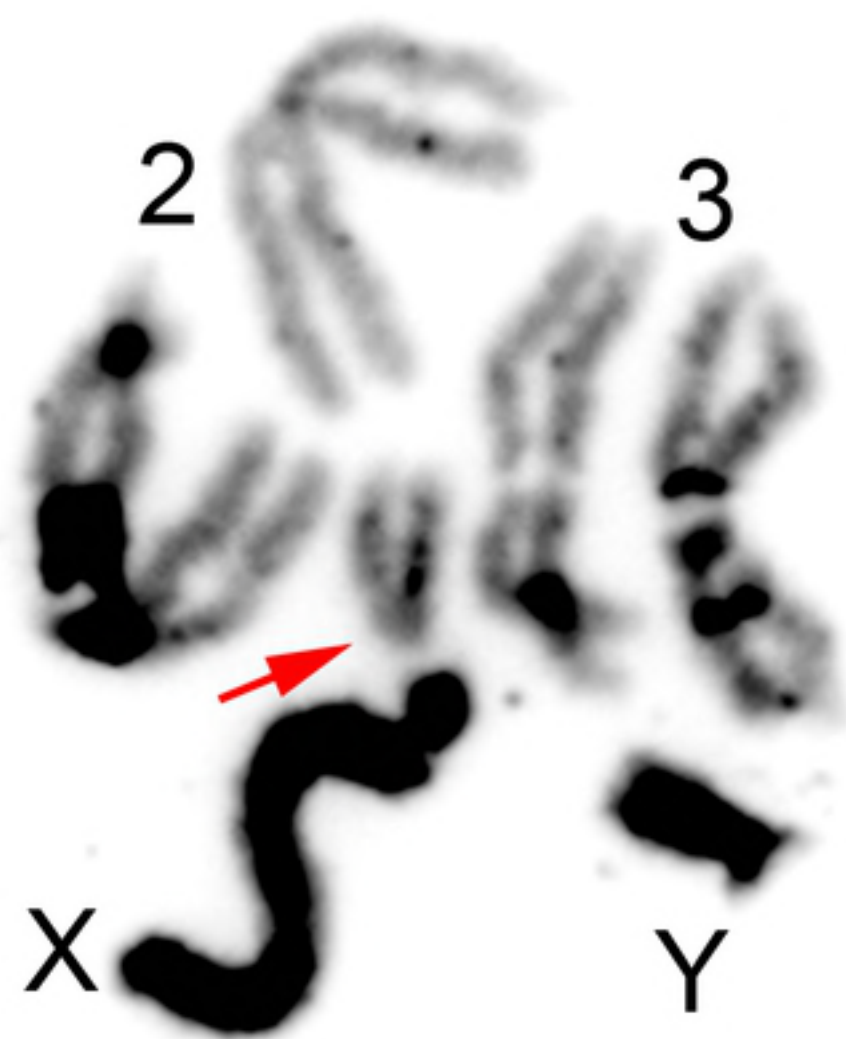

Figure 5

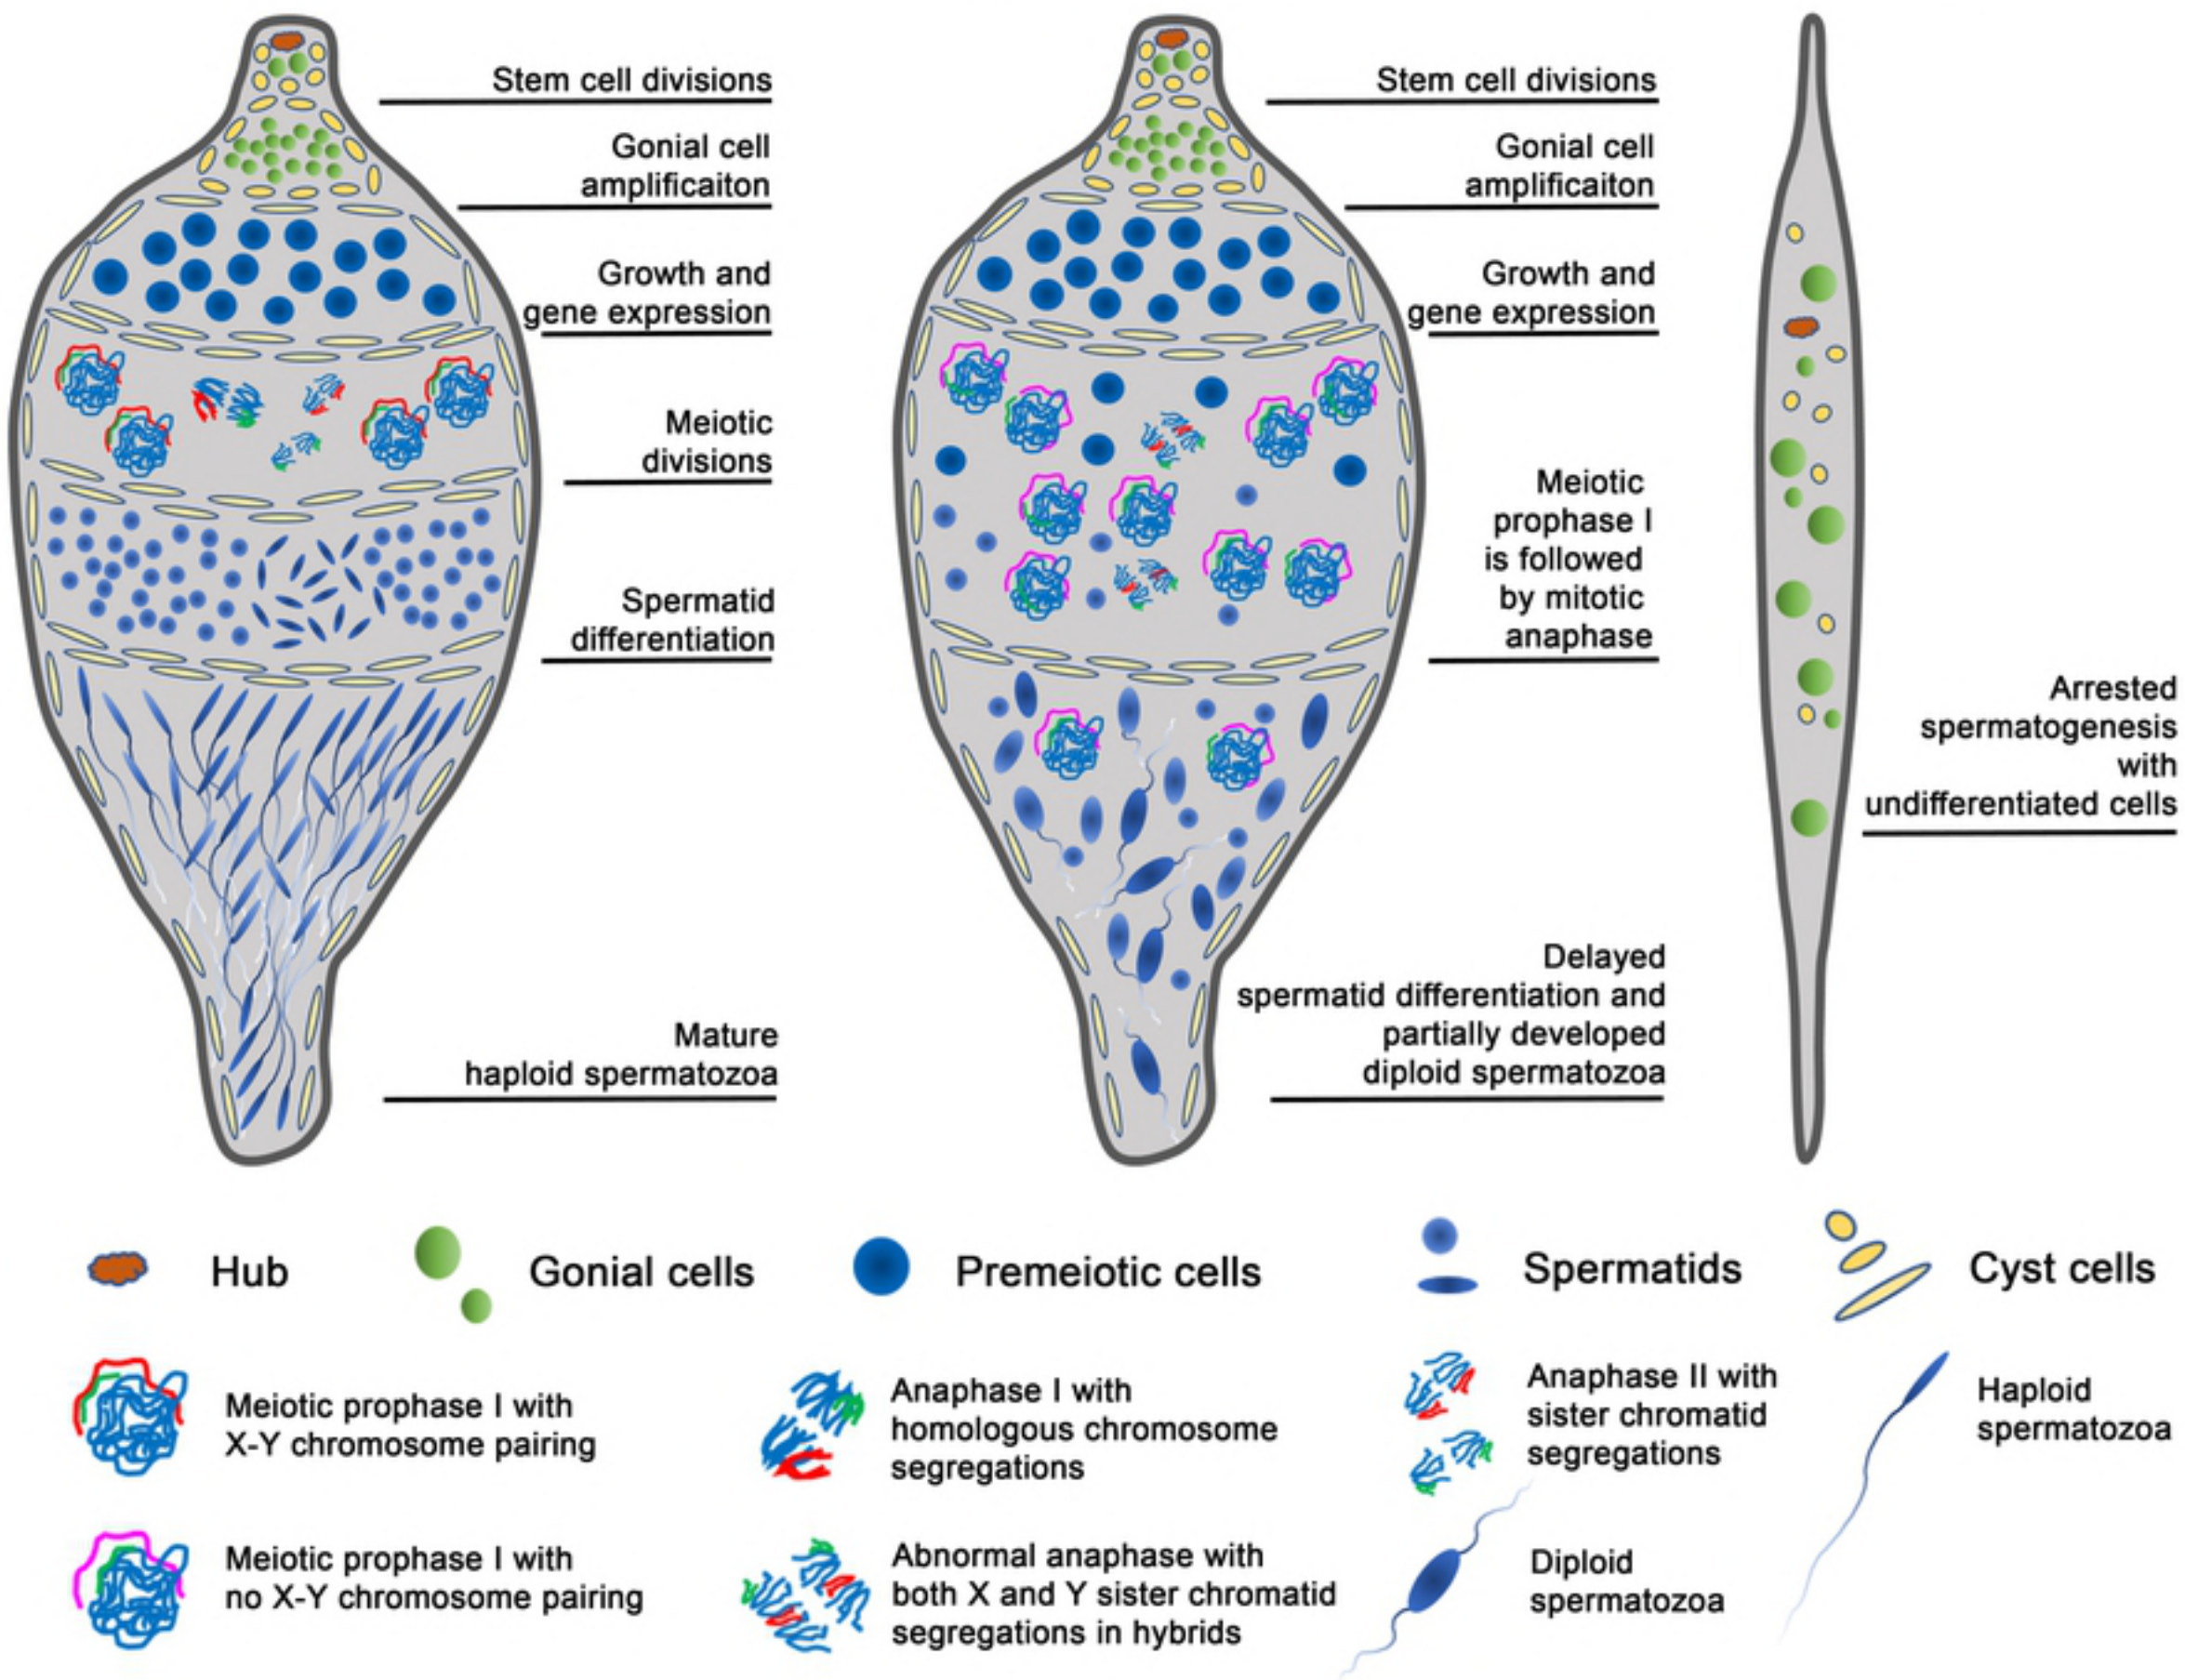

Figure 6

# Normal male meiosis in pure species

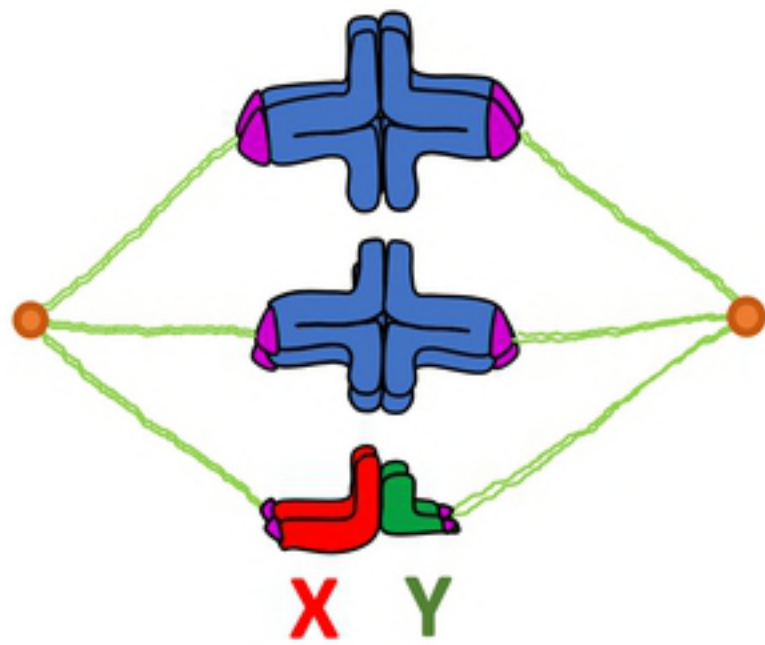

**Prophase I**

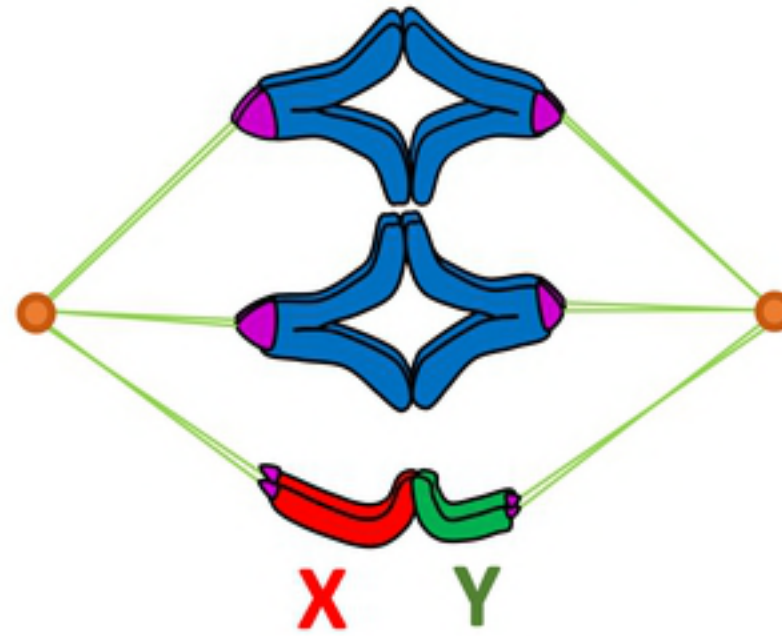

**Anaphase I**

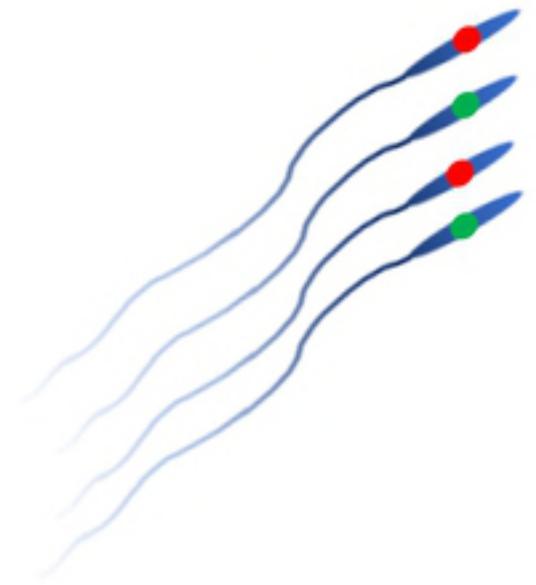

**Normal sperm**

# Failed male meiosis in F1 hybrids

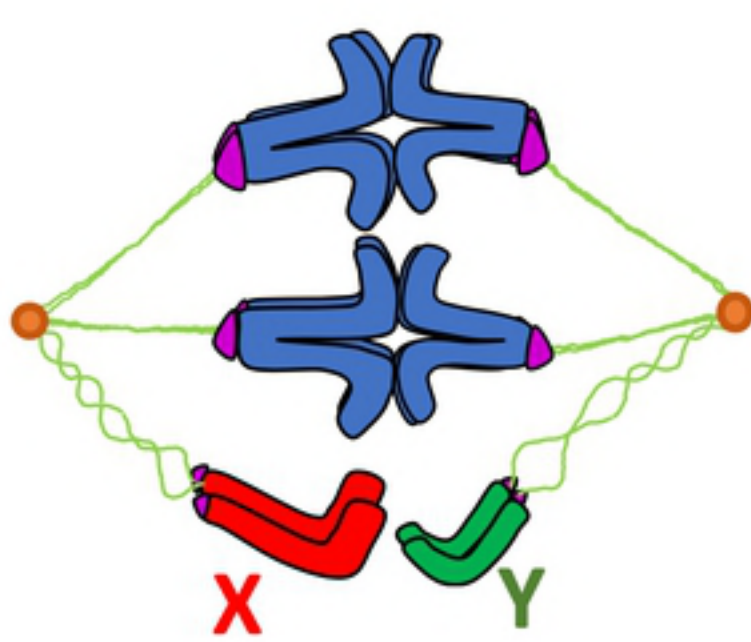

**Prophase I**

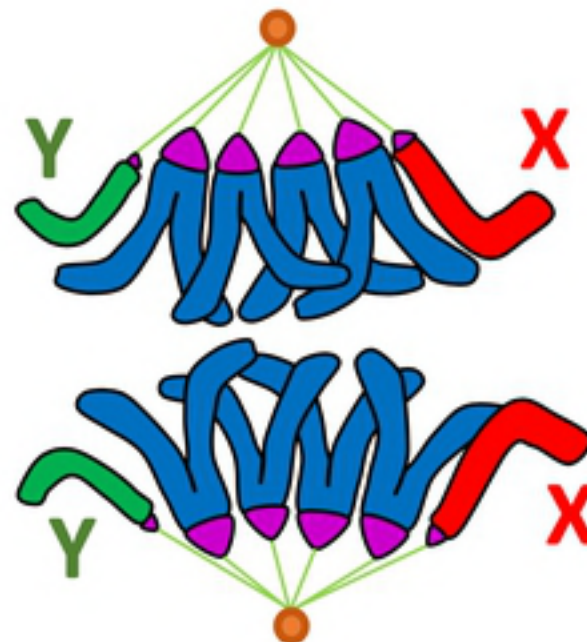

**Anaphase**

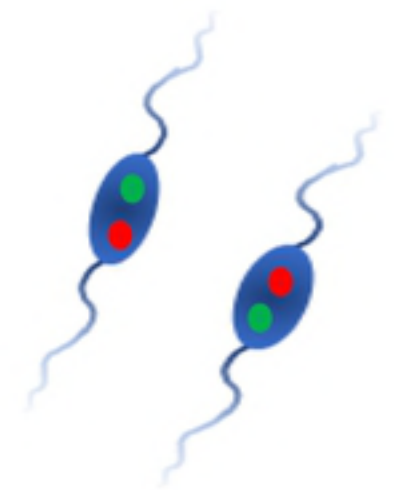

**Diploid sperm**
